1 **Indisulam targets RNA splicing and metabolism to serve as a novel therapeutic strategy**  
2 **for high-risk neuroblastoma**

3 Anke Nijhuis<sup>1§</sup>, Arti Sikka<sup>1§</sup>, Orli Yogev<sup>2§</sup>, Lili Herendi<sup>1</sup>, Clare Eckold<sup>1</sup>, Gabriel Valbuena<sup>1</sup>,  
4 Yusong Liu<sup>1</sup>, Eirini Kouloura<sup>1</sup>, Evon Poon<sup>2</sup>, Barbara Martins da Costa<sup>2</sup>, Adrian Benito<sup>1</sup>,  
5 Holger Kramer<sup>3</sup>, Alex Montoya<sup>3</sup>, David Carling<sup>3</sup>, Elizabeth J. Want<sup>4</sup>, Yann Jamin<sup>5</sup>, Louis  
6 Chesler<sup>2</sup> and Hector C. Keun<sup>1,4\*</sup>

7  
8 <sup>1</sup>Department of Surgery & Cancer, Imperial College London, London, UK <sup>2</sup>Division of  
9 Clinical Studies, The Institute of Cancer Research, London, UK. <sup>3</sup>Biological Mass  
10 Spectrometry and Proteomics Facility, Medical Research Council London Institute of  
11 Medical Science, London, UK <sup>4</sup>Department of Metabolism, Digestion and Reproduction,  
12 Imperial College London, London, UK. <sup>5</sup>Division of Radiotherapy and Imaging, The Institute  
13 of Cancer Research, London and Royal Marsden NHS Trust, UK.

14  
15 <sup>§</sup>These authors contributed equally to this manuscript, listed alphabetically.

16 <sup>\*</sup>Corresponding author, [h.keun@imperial.ac.uk](mailto:h.keun@imperial.ac.uk)

17 Key words: neuroblastoma, RBM39, indisulam, spliceosome, drug repurposing, cancer  
18 metabolism

19  
20 **Abstract**

21 Neuroblastoma is the most common solid tumour in childhood and prognosis remains poor  
22 for high-risk cases despite the use of multimodal treatment. Analysis of public drug  
23 sensitivity data showed neuroblastoma lines to be particularly sensitive to indisulam, a  
24 molecular glue that selectively targets RNA splicing factor RBM39 for proteosomal  
25 degradation via DCAF15-E3-ubiquitin ligase. In neuroblastoma models, indisulam induced  
26 rapid loss of RBM39, accumulation of splicing errors and growth inhibition in a DCAF15-  
27 dependent manner. Integrative analysis of RNAseq and proteomics data highlighted a distinct  
28 disruption to cell cycle and metabolism. Metabolic profiling demonstrated metabolome  
29 perturbations and mitochondrial dysfunction resulting from indisulam. Complete tumour  
30 without relapse was observed in both xenografts and the Th-*MYCN* transgenic model of  
31 neuroblastoma after indisulam treatment, with RBM39 loss confirmed *in vivo*. Our data imply

32 that dual targeting of metabolism and RNA splicing with anti-cancer sulphonamides such as  
33 indisulam is a promising therapeutic approach for high-risk neuroblastoma.

34

## 35 **Introduction**

36 Neuroblastoma is the most common solid and extra-cranial paediatric tumour, originating  
37 from neural crest cells of the sympathetic ganglia. Treatment options include surgical  
38 resection, cytotoxic chemotherapy, radiotherapy, myeloablative autologous stem cell  
39 transplantation and multimodal therapy. However, the prognosis for high-risk cases remains  
40 poor with a high incidence of tumour relapse [1]. Most high-risk cases are characterized by  
41 MYCN-amplification which accounts for 20% of all neuroblastoma cases [2].

42 Indisulam (E7070) is one of a class of aryl sulphonamides originally discovered by Eisai  
43 through several screens for small molecule inhibitors that block cell cycle progression [3, 4].  
44 Thereafter, studies revealed that indisulam targets multiple checkpoints through G1 and G2  
45 phases of the cell cycle, and disturbs and downregulates cyclin A, cyclin B, CDK2 and CDC2  
46 via p21/p53 dependent mechanisms [5]. Tumour regression in HCT116 xenografts by  
47 indisulam was superior to other anti-cancer compounds such as 5-FU and Irinotecan [6],  
48 which prompted the investigation of indisulam in Phase I/II clinical trials as an anticancer  
49 agent for several advanced solid tumours [7-13]. Despite acceptable toxicity profiles, clinical  
50 responses have been modest and the efficacy of indisulam has never been tested in  
51 neuroblastoma.

52 More recently, the precise molecular mechanism of action for indisulam was uncovered by  
53 two independent studies [14, 15]. Indisulam binds to and induces a ternary protein complex  
54 between RNA Binding Motif 39 (RBM39) and the E3 ubiquitin ligase receptor DDB1 and  
55 CUL4 Associated Factor 15 (DCAF15) resulting in rapid proteasomal degradation of  
56 RBM39, aberrant RNA splicing and cell death [14, 15]. DCAF15 expression was shown to be  
57 necessary for this mode of action and thus proposed as a stratification marker of response in  
58 haematopoietic malignancies [14]. RBM39 is an SR-rich protein homologous to, and  
59 associated with, the key splicing factors U2 auxiliary factor 65 (U2AF65) [16, 17] and  
60 SF3b155 [18]. RBM39 has been proposed to serve as a pre-mRNA splicing factor [16, 19,  
61 20] and loss of RBM39 causes alternative splicing defects [21]. Additionally, RBM39 is  
62 known to be a coactivator of transcription factors such as AP-1 and Estrogen Receptors (ER)

63 alpha and beta [20] and may also regulate metabolism via activation of the NF- $\kappa$ B/c-Myc  
64 pathway [22].

65 In this study, we demonstrate for the first time that indisulam is an effective anti-cancer agent  
66 in models of neuroblastoma. Indisulam reduced cellular growth and induced apoptosis *in*  
67 *vitro* and caused complete remission of tumours in two *in vivo* models of neuroblastoma.  
68 Indisulam results in DCAF15-dependent RBM39 degradation leading to splicing errors and  
69 reduced levels of proteins involved in cell cycle and metabolism. Consistent metabolic  
70 responses to indisulam were observed both *in vitro* and *in vivo*. In conclusion, our findings  
71 suggest that high-risk neuroblastoma may be particularly sensitive to the selective loss of  
72 RBM39 and modulation of splicing and metabolism by indisulam.

73

## 74 **Materials & Methods**

75 **Cell Culture.** IMR-32 cell line was purchased from the American Type Culture Collection  
76 (ATCC) (Manassas, VA). LS, SHEP and KELLY were obtained from the German Collection  
77 of Microorganisms and Cell Culture (DSMZ). All cell lines were maintained in ATCC's  
78 Eagle's Minimum Essential Medium (EMEM), supplemented with 10% foetal bovine serum  
79 (FBS) and 1% penicillin/streptomycin for routine culture. Cell lines were authenticated using  
80 short-tandem repeat DNA profiling by Public Health England and mycoplasma tested  
81 regularly.

82 **2-D Growth and viability assays.** Indisulam (E7070) was purchased from Sigma-Aldrich.  
83 Cells were counted at 72 hours with a trypan blue exclusion method using a haemocytometer  
84 or a Vi-CELL XR Cell Counter & Viability Analyser (Beckman Coulter). Cell viability was  
85 determined using the Vi-CELL XR analyser.

86 ***In vivo* experiments.** All experimental protocols were approved and monitored by The  
87 Institute of Cancer Research Animal Welfare and Ethical Review Body (PPL no. 70/7945,  
88 later PPL P91E52C32), in compliance with the UK Home Office Animals (Scientific  
89 Procedures) Act 1986, the United Kingdom National Cancer Research Institute guidelines for  
90 the welfare of animals in cancer research [23] and the ARRIVE guidelines [24].

91 *In vivo tumor xenograft of IMR-32 neuroblastoma cells*

92 *NCr-Foxn1<sup>tmu</sup>* mice were injected subcutaneously unilaterally with  $1.5 \times 10^6$  IMR-32 cells with  
93 30% matrigel (100 $\mu$ l total). Calipers were used to measure tumor diameter on two orthogonal

94 axes 2-3 times per week. Volume was calculated using the equation;  $v = 4/3\pi r^3$  (where  $r =$   
95 radius, calculated as an average of the two axes). Dosing occurred at predetermined mean  
96 tumor size of  $0.24\text{cm}^3 \pm 0.09$  or  $7\text{mm} \pm 0.09\text{mm}$  for 8 continuous days, *intravenous* with  
97 either indisulam 25 mg/kg or vehicle only (3.5% DMSO and 6.5% Tween 80 in saline) [6,  
98 25]. Survival studies were terminated when the mean diameter of the tumor reached  $1.9\text{cm}^3$ ,  
99 14mm or after 66 days of tumor free disease, vehicle (n=6), indisulam (n=6).  
100 Pharmacodynamic study; mice were treated for four days. Tumour tissue were harvested  
101 (snap frozen or fixed in 4% paraformaldehyde) for further analysis, vehicle (n=5), indisulam  
102 (n=5).

### 103 *In vivo model for neuroblastoma*

104 Th-*MYCN* mice (129X1/SvJ-Tg(Th-*MYCN*)41Waw/Nci) have been described previously  
105 [26]. In this study, we used heterozygous Th-*MYCN* mice in which we observe 30%  
106 penetrance with tumor onset of  $73 \pm 25$  days. Two to five mice were caged together and were  
107 allowed access to sterilized food and water *ad libitum*. Th-*MYCN* mice were monitored by  
108 palpation twice weekly and n=12 mice were enrolled into control group (n=6) or treated  
109 group (n=6) when tumors reached a palpation score of approximately 5 mm in diameter.  
110 Dosing was done for eight continuous days, *intravenous* with either indisulam 25 mg/kg or  
111 vehicle only (3.5% DMSO and 6.5% Tween 80 in saline). Studies were terminated when the  
112 tumor grew to a palpable size of 10 mm or immediately upon showing any signs of ill health.  
113 For survival analysis, mice were treated with indisulam were monitored for up to 124 days  
114 (n=5). Tumor size, animal weight, and overall animal well-being were scored daily  
115 throughout the study. One animal from the treated group was culled due to generalized ill-  
116 health at day 7; autopsy showed no macroscopic tumor residual but evidence of bowel  
117 obstruction.

118 MR images were acquired on a 1 Tesla M3 small animal MRI scanner (Aspect Imaging,  
119 Shoham, Israel). Mice were anaesthetised using isoflurane delivered via oxygen gas and their  
120 core temperature was maintained at 37C. Anatomical fat-suppressed T<sub>2</sub>-weighted coronal  
121 images (TE=9ms, TR=4600ms) were acquired from 20 contiguous 1-mm-thick slices through  
122 the mouse abdomen, from which tumour volumes were determined using segmentation from  
123 regions of interest drawn on each tumour-containing slice using Horos medical image  
124 viewer. MRI was performed on a subgroup of mice throughout the study subject to  
125 equipment availability (n=4 vehicle, n=3 indisulam).

126 **Protein analysis.** Protein was extracted using RIPA buffer with 1% protease inhibitor  
127 (Sigma) and quantified using the BCA protein assay (ThermoScientific Pierce). 20µg of  
128 protein was loaded on a 4-20% Mini-Protean TGX pre-cast gel (Bio-Rad). Anti-RBM39  
129 (HPA001591, Sigma) and Anti-beta-actin (ab8226, Abcam). CDK4 (ab108375, Abcam  
130 TYMS (ab108995, Abcam).

131 **siRNA knockdown.** IMR-32 or KELLY cells were seeded overnight in 96 or 6-well plates.  
132 Cells were transfected with SMARTpool DCAF15 siRNA (L-0.31237-01, Dharmacon, GE  
133 Healthcare) or a non-targeting control siRNA (NTC, D-001810-01-05) at a final  
134 concentration of 30nM and Lipofectamine 2000 transfection reagent (Invitrogen, UK). 6-well  
135 plates were treated with indisulam (vehicle control, 1µM or 10µM indisulam) 48hr post-  
136 transfection for 6hr and RNA/protein harvested accordingly. For RBM39 knockdown,  
137 HCT116 cells were transfected with SMARTpool RBM39 (L-011965-00, Dharmacon) or  
138 NTC at 30nM. Post-transfection RNA and protein was harvested for downstream analysis of  
139 mis-splicing and protein levels.

140 **RNA extraction and PCR.** Total RNA was extracted using the RNeasy Mini kit (Qiagen)  
141 according to the manufacturer's protocol. On-column DNase treatment was performed to  
142 remove contaminating genomic DNA. RNA concentration and purity was determined using  
143 the Nano-Drop Spectrometer (Nano-Drop Technologies, U.S.A). Reverse-transcription (RT)  
144 was performed on 2µg of RNA using the High-Capacity-RNA to cDNA kit (Applied  
145 Biosystems, U.K.) in a 20µL reaction. Exon skipping in *TRIM27* and *EZH2* was assessed  
146 using end-point PCR. 100ng cDNA was amplified with Q5® Hot Start High-Fidelity DNA  
147 Polymerase (New England BioLabs). Primers are noted in table 1.

148 **Table 1. PCR primer sequences for end-point PCR**

| Gene          | Forward and reverse sequences '5 to '3       |
|---------------|----------------------------------------------|
| <i>TRIM27</i> | CCTGAACCTTGGATCACACC<br>GCAGGTCCTGTTGGAGGTAA |
| <i>EZH2</i>   | CCGCTGAGGATGTGGATACT<br>ACTCTCGGACAGCCAGGTAG |
| <i>CDK4</i>   | GTGTATGGGGCCGTAGGAAC<br>CCAACACTCCACATGTCCAC |
| <i>GAPDH</i>  | GGCTGCTTTTAACTCTGG<br>GGAGGGATCTCGCTCC       |

149 **Immunofluorescence on tissue.** Tumours were processed using a ASP300S tissue processor  
150 (Leica) according to the manufacturer's instructions. Sections were de-paraffinized and  
151 rehydrated through Histo-Clear and graded alcohol series, rinsed for 5 min in tap water,  
152 boiled for 5 min in 1% citric-acid buffer and left to cool to RT. Endogenous enzyme activity  
153 was blocked by 1% H<sub>2</sub>O<sub>2</sub> for 20 min followed by 3 washes in ddH<sub>2</sub>O. Sections were blocked  
154 for 1h in TBS 0.01% Triton (TBST), 5% BSA, RBM39 (HPA001591, Sigma, UK) or Ki67  
155 (Cat #556003, BD Bioscience, UK) antibody was incubated at RT overnight 1:100, washed in  
156 TBST, 2<sup>nd</sup> Alexa Fluor 488/555 goat anti-rabbit antibody was incubated at RT for 1hr  
157 (1:500). Antibody solution; TBST, 5% BSA. Images were captured by confocal microscopy  
158 (LSM700, LSM T-PMT) and processed by ZEN2012 (Zeiss) software.

159 **Metabolic analysis.** The Seahorse Bioscience (Agilent Technologies) XFe96 analyser was  
160 used to measure extracellular acidification rate (ECAR) and oxygen consumption rate (OCR).  
161 Cells were seeded overnight at 60,000 cells/well. Wells were mixed for 3min and  
162 measurements were taken for 3min. The reported data points are the change in concentration  
163 over 3 minutes, recorded as mpH/minute for ECAR and pmol/minute for OCR. Protein  
164 content (BCA) was used for normalisation.

165 **Fluorescence assays.** The JC-1 mitochondrial membrane potential assay kit and the  
166 DCFDA/H<sub>2</sub>DCFDA - Cellular Reactive Oxygen Species Detection assay kit were purchased  
167 from Abcam. For the JC-1 assay kit, 80,000 cells/well were seeded overnight. Cells were  
168 dosed with 10µM indisulam for 6hr and 5µM of reagent was used for the assay. For the  
169 DCFDA assay, 30,000 cells/well were seeded overnight. Cells were dosed with 100nM of  
170 indisulam for 72hr and the reagent was incubated with cells for 3hr and removed before  
171 fluorescence measurement. The manufacturer's guidelines were followed with appropriate  
172 positive controls and fluorescence was measured using the BMG LABTECH CLARIOstar  
173 plate reader. Biomass content (BCA or SRB) was used for normalisation.

174 **GC-MS analysis.** Samples were kept on dry ice throughout. Tumour samples were weighed  
175 and 20mg were used for analysis. Tissue was added to screw-cap tubes containing 0.1 mm  
176 glass beads (Bertin Technologies). 800µl of pre-chilled 80% methanol was added and  
177 samples were homogenised using a Precellys 24 bead beater (Bertin Technologies) set to  
178 6500 rpm x 20 seconds x 2 cycles. Supernatants were collected after centrifugation (12,000g,  
179 5min, at 4°C). The extraction was repeated and the fractions for each sample were pooled.  
180 Supernatants were then dried in a vacuum concentrator and subjected to dual-phase  
181 extraction. 300µl of chloroform/methanol (2:1) was added to each sample followed by

182 vortexing. 300µl of water was then added to each sample followed by vortexing and  
183 centrifugation (14,000rpm, 10 minutes at 4°C). The aqueous (upper) layer from each sample  
184 was transferred to silanized GC-MS vials. The dual-phase extraction was repeated and  
185 fractions were pooled for each sample.

186 In-house protocols adapted from previous reports [27] were used for GC-MS analysis, a  
187 summary is provided here. 10µl of 1.5 mg/ml myristic acid-d27 (internal standard) was added  
188 to each dried extract. Metabolites extracts were derivatised using the two-step method of  
189 derivatisation: methoxyamination and silylation [28]. When required, samples were diluted  
190 with anhydrous pyridine. Samples were analysed in a splitless mode on an Agilent 7890 GC  
191 with a 30 m DB-5MS capillary column and a 10m Duraguard column. This GC was coupled  
192 to an Agilent 5975 MSD [28]. Metabolites were assigned using FiehnLib assisted processing  
193 in AMDIS [29] and manually assessed using the Gavin package [27]

194 **Metabolome analysis by LC-MS/MS.** Cells were seeded to reach confluency in a 6-well  
195 plate format and then dosed with 10µM indisulam for 6hr. Parallel wells were counted for  
196 normalisation. A mixture of internal standards was added before extraction to account for  
197 variability during sample preparation. Cells were washed twice with 1 ml of Ringer's buffer  
198 and quenched with 1 ml of 80% cold methanol. After a 20min incubation on dry ice, cells  
199 were scraped, and the extract was transferred to 1.5 ml tubes. The wells were washed with  
200 another 0.5ml of 80% cold methanol and the extracts were pooled. Tubes were vortexed  
201 vigorously and spun down at 13,000rpm for 20min at 4°C. Supernatants were transferred to  
202 LC-MS vials and dried under nitrogen flow. Samples were stored at -40°C until LC-MS/MS  
203 analysis. Dry extracts were reconstituted at approximately 10,000 cells/µl with ACN/H2O  
204 (9:1) (positive and negative ionisation mode) or mobile phase B (negative ionisation mode).

205 Metabolites were separated at 50°C through an ACQUITY UPLC BEH amide column (1.7  
206 µm, 2.1 x 150 mm) (Waters, MA, U.S.A.) using an in-house developed Hydrophilic  
207 Interaction Chromatography (HILIC) method. In negative mode, mobile phase was composed  
208 of A) 10mM ammonium hydroxide in acetonitrile and B) 20mM ammonium acetate, 10mM  
209 ammonium hydroxide in water. Chromatographic separation was achieved within 15min. The  
210 water composition was held at 10% for 1 min before ramping to 55% by 8 min, subsequently  
211 returning to 10% by 9.10 min for column re-equilibration. In positive mode, mobile phase  
212 was composed of A) 0.1% formic acid in acetonitrile and B) 0.1% formic acid, 20mM  
213 ammonium formate in water. The water composition was held at 5% for 1 min before  
214 ramping up to 50% by 8 min, subsequently returning to 5% by 9.10 min for column re-

215 equilibration. The flow rate was set to 0.5 ml/min and the total runtime was 45min per sample  
216 for both ionisation modes. The injection volume was set to 5 $\mu$ l and the samples were  
217 maintained at 8°C in the auto-sampler. For MS/MS analysis, an electrospray ionisation- triple  
218 quadrupole mass spectrometer (AB Sciex 4000) was used in the multiple reaction monitoring  
219 (MRM) mode. All methods were built using a scheduled MRM algorithm by applying a  
220 MRM detection window of 90 seconds and a target scan time of 2 seconds.

## 221 **Protein identification and quantification by LC-MS/MS**

### 222 *Sample processing*

223 Protein samples (50 $\mu$ g/replicate) were processed using the Filter Aided Sample Preparation  
224 (FASP) protocol [30]. Briefly, samples were loaded onto 30 kDa centrifugal concentrators  
225 (Millipore, MRCF0R030) and buffer exchange was carried out by centrifugation on a bench  
226 top centrifuge (15min, 12,000g). Multiple buffer exchanges were performed sequentially with  
227 UA buffer (8M urea in 100mM Tris pH 8.5, 3x200 $\mu$ l), reduction with 10mM DTT in UA  
228 buffer (30min, 40°C) and alkylation with 50mM chloroacetamide in UA buffer (20min,  
229 25°C). This was followed by buffer exchange into UA buffer (3x100 $\mu$ l) and 50mM  
230 ammonium bicarbonate (3x100 $\mu$ l). Digestion was carried out with mass spectrometry grade  
231 trypsin (Promega, V5280) using 1 $\mu$ g protease per digest (16hr, 37°C). Tryptic peptides were  
232 collected by centrifugation into a fresh collection tube (10min, 12,000g) and washing of the  
233 concentrator with 0.5M sodium chloride (50 $\mu$ l, 10min, 12,000g) for maximal recovery.  
234 Following acidification with 1% trifluoroacetic acid (TFA) to a final concentration of 0.2%,  
235 collected protein digests were desalted using Glygen C18 spin tips (Glygen Corp,  
236 TT2C18.96) and peptides eluted with 60% acetonitrile, 0.1% formic acid (FA). Eluents were  
237 then dried using vacuum centrifugation.

### 238 *Liquid chromatography-tandem mass spectrometry (LC-MS/MS) analysis*

239 Dried tryptic digests were re-dissolved in 0.1% TFA by shaking (1200rpm) for 30min and  
240 sonication on an ultrasonic water bath for 10min, followed by centrifugation (20,000g, 5°C)  
241 for 10min. LC-MS/MS analysis was carried out in technical duplicates and separation was  
242 performed using an Ultimate 3000 RSLC nano liquid chromatography system (Thermo  
243 Scientific) coupled to a coupled to a Q-Exactive mass spectrometer (Thermo Scientific) via  
244 an EASY spray source (Thermo Scientific). For LC-MS/MS analysis protein digest solutions  
245 were injected and loaded onto a trap column (Acclaim PepMap 100 C18, 100 $\mu$ m  $\times$  2cm) for  
246 desalting and concentration at 8 $\mu$ l/min in 2% acetonitrile, 0.1% TFA. Peptides were then



247 eluted on-line to an analytical column (Acclaim Pepmap RSLC C18, 75 $\mu$ m  $\times$  75cm) at a flow  
248 rate of 200nl/min. Peptides were separated using a 120 minute gradient, 4-25% of buffer B  
249 for 90 minutes followed by 25-45% buffer B for another 30 minutes (composition of buffer B  
250 – 80% acetonitrile, 0.1% FA) and subsequent column conditioning and equilibration. Eluted  
251 peptides were analysed by the mass spectrometer operating in positive polarity using a data-  
252 dependent acquisition mode. Ions for fragmentation were determined from an initial MS1  
253 survey scan at 70,000 resolution, followed by HCD (Higher Energy Collision Induced  
254 Dissociation) of the top 12 most abundant ions at 17,500 resolution. MS1 and MS2 scan  
255 AGC targets were set to 3e6 and 5e4 for maximum injection times of 50ms and 50ms  
256 respectively. A survey scan m/z range of 400 – 1800 was used, normalised collision energy  
257 set to 27%, charge exclusion enabled with unassigned and +1 charge states rejected and a  
258 minimal AGC target of 1e3.

#### 259 *Raw data processing*

260 Data was processed using the MaxQuant software platform (v1.6.1.0), with database searches  
261 carried out by the in-built Andromeda search engine against the Uniprot *H.sapiens* database  
262 (version 20180104, number of entries: 161,521). A reverse decoy search approach was used  
263 at a 1% false discovery rate (FDR) for both peptide spectrum matches and protein groups.  
264 Search parameters included: maximum missed cleavages set to 2, fixed modification of  
265 cysteine carbamidomethylation and variable modifications of methionine oxidation, protein  
266 N-terminal acetylation and serine, threonine, tyrosine phosphorylation. Label-free  
267 quantification was enabled with an LFQ minimum ratio count of 2. ‘Match between runs’  
268 function was used with match and alignment time limits of 1 and 20 minutes respectively.

269 **Genomic analysis.** Indisulam area under the curve (AUC) sensitivity data was acquired from  
270 The Cancer Target Discovery and Development (CTD2) Network [31]. Gene expression data  
271 was acquired from The Cancer Cell Line Encyclopaedia (CCLE) project,  
272 (<https://portals.broadinstitute.org/ccle/home>) and from The Cancer Therapeutics Response  
273 Portal <http://portals.broadinstitute.org/ctrp> (Broad Institute).

274 Total RNA was extracted using the RNeasy Mini kit (Qiagen) and quantified by Qubit  
275 (Thermo Fisher) to assess sample integrity. Ribosomal and mitochondrial RNA were  
276 removed via ribodepletion. Seventy-five base paired end reads were sequenced by the  
277 Imperial BRC Genomics Facility using the HiSeq4000 (Illumina) resulting in ~45 million  
278 reads per sample. Data were aligned to the human reference genome (version hg19) using

279 HISAT2 (v 2.1.0) and BAM files were visualised using the Integrative Genome Viewer  
280 (Broad Institute). Read counts were quantified using function feature Counts from the R  
281 package Rsubread (v 1.34.7).

282 Proteomics analysis from IMR-32 cells subjected to 5 $\mu$ M indisulam for 6 and 16 hours was  
283 used for further analysis. The mean of three duplicates was taken and fold changes were  
284 calculated at 6hr and 16hr relative to the corresponding vehicle control. P-values were  
285 corrected using the Benjamini Hochberg method and were considered significant if <0.05.  
286 Further, genes that were identified as mis-spliced were compared with statistically significant  
287 up and down-regulated proteins (at 16hr indisulam exposure versus vehicle control). The  
288 overlap of which was then imported into the Consensus PathDB interaction database  
289 (provided by Max Planck Institute for Molecular Genetics <http://cpdb.molgen.mpg.de/>) for  
290 pathway enrichment analysis.

291 **Alternative splicing analysis.** SpliceFisher ([github.com/jiwoongbio/SpliceFisher](https://github.com/jiwoongbio/SpliceFisher)) was used  
292 to detect alternative splicing events, where exon and intron regions were defined from the  
293 hg19 human reference genome. To estimate differential exon skipping events, the number of  
294 exon-junction reads and exon skipping reads were calculated and compared with the vehicle  
295 control (Suppl. Fig. S1). Alternatively, for differential intron retention, the numbers of exon-  
296 intron and exon-exon reads were used. Read counts were evaluated by multiple Fisher's exact  
297 tests in three two-by-two tables using R, and p-values were adjusted using the Benjamini-  
298 Hochberg method and deemed significant p <0.05.

299 **Data availability.** The mass spectrometry proteomics data have been deposited to the  
300 ProteomeXchange Consortium via the PRIDE [32] partner repository with the dataset  
301 identifier PXD022164. The data discussed in this publication have been deposited in NCBI's  
302 Gene Expression Omnibus [33] and are accessible through GEO Series accession number  
303 160446.

304

## 305 **Results**

### 306 **Indisulam causes growth inhibition, selective depletion of RBM39 and global RNA mis-** 307 **splicing in cellular models of neuroblastoma**

308 We first sought to investigate tumour types that are likely to respond to aryl sulphonamides  
309 by probing publicly available databases with measurements of indisulam efficacy across 758

310 cancer cell lines [31]. When sensitivity (as Area under the Curve, AUC) was reviewed by  
311 tumour type, cell lines of the neuroblastoma lineage showed greatest sensitivity (Fig. 1a) in  
312 comparison with cell lines from other lineages (Mann-Whitney test,  $p < 0.0001$ ; Fig. 1b).  
313 Indisulam efficacy was validated using a panel of *in vitro* models of neuroblastoma (IMR-32,  
314 LS, SHEP and KELLY). Indisulam induced growth inhibition and loss of viability in all four  
315 neuroblastoma cell lines (Fig. 1c-d) both in monolayer culture and in 3-D spheroids (Suppl.  
316 Fig. S2). An increased caspase activity was observed indicating cell death by apoptosis  
317 (Suppl. Fig. S2).

318 To confirm that indisulam induced selective RBM39 degradation in neuroblastoma, we  
319 performed LC-MS based global label-free proteomics following indisulam treatment in IMR-  
320 32 cells. After six hours treatment ( $5\mu\text{M}$ ) we observed a highly selective loss of RBM39  
321 abundance ( $\sim 9$  fold reduction) compared to  $\sim 4300$  other detected proteins (Fig. 2a). The  
322 degradation of RBM39 was validated by western blot in two neuroblastoma cell lines; IMR-  
323 32 and KELLY (Fig. 2b) and the dependency on proteasome function for this response was  
324 confirmed by rescue with the proteasomal inhibitor bortezomib (Suppl. Figure S3). Since the  
325 loss of RBM39 is associated with defects in RNA splicing, we sought to identify transcripts  
326 that were affected following indisulam treatment in IMR-32 cells using total RNAseq.  
327 Stringent detection of altered events such as the skipping of cassette exons or the incorrect  
328 inclusion of introns was performed using *SpliceFisher* ([github.com/jiwoongbio/SpliceFisher](https://github.com/jiwoongbio/SpliceFisher),  
329 [14]). Indisulam caused a high number of significant exon skipping (1893) and intron  
330 retention (1571) events (Fig. 2c). These include splicing events consistently reported  
331 subsequent to indisulam exposure such as the skipping of exon 6 and 7 of *TRIM27* (Fig. 2d –  
332 black arrows), and both exon skipping and intron retention in *EZH2* (Suppl. Fig. S4) [14, 15].  
333 Using PCR assays we validated dose- and time-dependent exon skipping of *TRIM27* (Fig. 2e-  
334 f) and mis-splicing of *EZH2* (Suppl. Fig. S4) in both KELLY and IMR-32 cell lines.  
335 Collectively, these data were consistent with the hypothesis that selective degradation of  
336 RBM39 and defects in pre-mRNA splicing were likely to be the mechanism for the anti-  
337 proliferative effect of indisulam in neuroblastoma.

338

339 **DCAF15 expression is necessary for the degradation of RBM39 and downstream mis-**  
340 **splicing**

341 The expression of DCAF15 E3 ligase has been suggested to be critical for the mode of action  
342 of aryl sulphonamides including indisulam [14, 15]. To confirm that this was the case, we  
343 tested the correlation between gene expression and indisulam sensitivity using a large  
344 compound sensitivity data and gene expression for 758 cancer cell lines (The Cancer Target  
345 Discovery and Development Network [31]). Across all cell lines, sensitivity to indisulam was  
346 significantly correlated to *DCAF15* mRNA expression (Suppl. Fig. S5a). In addition, gene  
347 expression from over 1100 cell lines in the Cancer Cell Line Encyclopaedia (CCLE) database  
348 showed that levels of *DCAF15* in neuroblastoma cell lines was the highest among all solid  
349 tumour types (Suppl. Fig. S5b), further supporting the hypothesis that neuroblastoma patients  
350 could represent a target population for therapeutic intervention with aryl sulphonamides, such  
351 as indisulam.

352 To study the essentiality of DCAF15 in the mode of action of indisulam, we conducted  
353 knockdown experiments using siRNA interference in IMR-32 and KELLY cell lines. We  
354 show that indisulam sensitivity could be partially rescued in both KELLY and IMR-32 cells  
355 following DCAF15 knockdown (Fig. 3a). In addition, DCAF15 knockdown prevented  
356 RBM39 protein degradation (Fig. 3b), indicating that DCAF15 is necessary for this process.  
357 In accordance with this, mis-splicing in *TRIM27* (Fig. 3c) and *EZH2* (Suppl. Fig. S6) was not  
358 observed when DCAF15 was silenced. These findings support the hypotheses that the E3  
359 ligase DCAF15 is necessary for indisulam-mediated growth inhibition and mis-splicing of  
360 pre-mRNA in neuroblastoma.

361

### 362 **Indisulam abrogates proteins involved in cell cycle and metabolism through RBM39-** 363 **mediated alternative splicing.**

364 To capture the consequence of aberrant alternative splicing on protein levels in an unbiased  
365 way, we integrated transcriptomic and proteomic analyses post indisulam treatment in IMR-  
366 32 neuroblastoma cell line (5 $\mu$ M, 16hr). This multi-omic approach revealed that down-  
367 regulated proteins largely overlapped with transcripts that were mis-spliced (Fig. 4a-b)  
368 (231/367 (62%) of downregulated proteins were mis-spliced in contrast to 87/502 (17%)  
369 upregulated proteins). Of these 231 transcripts, the majority experienced intron retention  
370 (174/231 = 75%), which is in line with the observation that the presence of intron-retained  
371 transcripts correlates to reduced protein levels often through nonsense mediated decay  
372 (NMD) [34] To gain insight into the pathways affected by indisulam, the 231 target genes

373 were subjected to pathway enrichment analysis which revealed that pathways associated with  
374 cell cycle and metabolism were particularly affected. (Fig. 4b, full table in supplementary  
375 data). Indisulam was originally discovered as an inhibitor of cell cycle [3, 4] which is  
376 consistent with the enrichment among down-regulated proteins of those involved in cell cycle  
377 progression. By contrast, the observation that one-carbon and lipid pathways are affected by  
378 RBM39 loss has not been reported previously and could be more specific to neuroblastoma.  
379 To test the generalisability of these responses we compared highly significant observations in  
380 IMR-32 cells to responses in the colorectal cancer cell line HCT116, also known to be highly  
381 sensitive to indisulam [14, 35]. Proteomic analysis showed a significant decrease of the  
382 cyclin-dependent kinase CDK4 in both IMR-32 cells (logFC=-1.063, adj. p=3.73E-05; Fig.  
383 4a) and in HCT116 (logFC=-0.473). Similarly, within the one-carbon pathway, thymidylate  
384 synthase (TYMS) was depleted in both IMR-32 (logFC=-1.169, adj.p=5.21E-05; Fig. 4a) and  
385 HCT116 cells (logFC=-1.212). Protein down-regulation of CDK4 and TYMS, as well as  
386 exon skipping of *CDK4* was independently validated in IMR-32 and KELLY cells (Fig. 4c-  
387 d).

388 To confirm that these events were specifically downstream of RBM39 loss, we conducted  
389 knockdown of RBM39 via siRNA in HCT116 cells and found mis-splicing of several genes,  
390 and a reduction of CDK4 and TYMS protein levels (Suppl. Fig. S7). Together, these data  
391 demonstrate that aberrant protein levels in cell cycle and metabolic pathways are a direct  
392 consequence of the loss of RBM39 and erroneous splicing of RNA following indisulam  
393 treatment and are not lineage specific responses to indisulam.

394

### 395 **Indisulam perturbs redox balance and mitochondrial metabolism**

396 Indisulam was previously reported to be a potent inhibitor of the extracellular carbonic  
397 anhydrase IX (CAIX) in cell-free assays [36]. Thus, indisulam might be expected to have a  
398 metabolic impact by preventing extracellular acidosis and consequently inhibiting glycolysis,  
399 however this mechanism has not previously been tested in cellular models of neuroblastoma.  
400 Extracellular acidification rate (ECAR), a proxy for glycolytic rate, and oxygen consumption  
401 rate (OCR) were therefore assessed in IMR-32 cells treated with indisulam. Notably,  
402 indisulam did not alter ECAR as anticipated but reduced OCR in cells determined by both the  
403 Seahorse Bioanalyzer (Fig. 5a-b) and MitoXpress assays (Suppl. Fig. S8). In addition,  
404 indisulam significantly increased levels of ROS (DCFDA fluorescence; Fig. 5c) and

405 depolarised the mitochondrial membrane ( $\Delta\psi_m$ ; Fig. 5d). These observations are however  
406 consistent with reported increases in mitochondrial superoxide and reduced OCR associated  
407 with RBM39 silencing in non-transformed hepatocytes [22]. Overall, these data indicate that  
408 indisulam affects mitochondrial metabolism in neuroblastoma cells and does not induce the  
409 metabolic phenotypes typically associated with CAIX inhibition.

410 To assess if indisulam affects metabolite levels on a wider scale, metabolomic changes were  
411 characterised using LC-MS/MS in IMR-32 neuroblastoma cell line. Acute treatment (6hr,  
412 5 $\mu$ M) with indisulam induced significant increases in the pool sizes of many metabolites  
413 including non-essential amino acids (proline, serine, aspartate and glycine) and TCA-cycle  
414 intermediates (malate and fumarate) (Fig. 5e). Alterations in these pathways were validated  
415 using orthogonal GC-MS assays with significant metabolite changes confirmed in malate,  
416 serine, glycine and proline (Suppl. Fig. S9). Reactions such as the conversion of malate to  
417 aspartate are dependent on the reduction of NAD<sup>+</sup> to NADH while the conversion of proline  
418 to 1-pyrroline-5-carboxylate uses coenzyme FAD and reduces it to FADH<sub>2</sub> (Fig. 5f); thus an  
419 increased amount of these metabolites could also be linked to altered redox balance within  
420 the cells. To examine this, changes in the NADH/NAD<sup>+</sup> ratio in IMR-32 cells after indisulam  
421 treatment were investigated (Fig. 5g). This revealed a significant increase in the  
422 NADH/NAD<sup>+</sup> ratio in indisulam treated cells, confirming that redox balance is affected by  
423 treatment. In summary, these data show that indisulam causes significant impact on cellular  
424 metabolism including the accumulation of substrates for nucleotide synthesis and one carbon  
425 donors (aspartate, serine, glycine), consistent with the mis-splicing of biosynthetic genes in  
426 one-carbon metabolism. Furthermore, indisulam disrupted redox balance and mitochondrial  
427 oxidation, consistent with the known consequences of RBM39 depletion and ruling out CAIX  
428 inhibition as a likely mediator.

429

### 430 **Indisulam is highly efficacious in two mouse models of neuroblastoma**

431 Given that indisulam showed profound efficacy in a panel of neuroblastoma lines *in vitro*,  
432 indisulam was tested in an *in vivo* xenograft model. IMR-32 cells were subcutaneously  
433 injected into NCr Foxnu mice, randomised and were dosed intravenously for eight days with  
434 indisulam (25mg/kg) or vehicle [6]. Complete tumour regression and a 100% survival rate  
435 (Fig. 6a-d) were reported in the treated group compared to the vehicle. Notably, no disease  
436 relapse was observed for up to 66 days after cessation of treatment. To study

437 pharmacodynamic markers and confirm mechanism of action *in vivo*, xenograft tissue was  
438 harvested after 4 days of treatment. This time point was chosen based on tumour sizes  
439 observed during survival study. At day 4, xenograft tumour volume was on average 94% of  
440 starting volume (indisulam arm n=5, 94%  $\pm$  48%, Suppl. Fig. S10). Immunofluorescence  
441 experiments revealed nuclear morphologic changes in indisulam treated mice, but cells  
442 remained positive for proliferation marker Ki67 (Suppl. Fig. S11). Xenograft tumours were  
443 analysed for RBM39 degradation (Fig. 6e) and mis-splicing of *CDK4* (Fig. 6f),  
444 demonstrating evidence of target engagement and mis-splicing of predicted genes confirming  
445 the downstream mode of action of indisulam *in vivo*. Xenograft tumours (4 days treatment)  
446 were also subjected to metabolic analysis via GC/MS (n=5 vehicle, n=5 indisulam; Suppl.  
447 Fig. S12) to validate metabolomic changes in the tumour. We observed a significant increase  
448 in amino acids proline, serine and glycine (Fig. 6g) in concordance with our *in vitro*  
449 observations in IMR-32 (Fig. 5e). Thus, we were able to demonstrate key pharmacodynamic  
450 (PD) responses to indisulam *in vivo* that provide proof-of-concept for target modulation and  
451 the proposed downstream mechanism of gene mis-splicing, protein depletion and altered  
452 metabolism in neuroblastoma models.

453 A second murine model was employed to establish further the efficacy of indisulam *in vivo*; a  
454 widely used Th-*MYCN* transgenic engineered mouse model (129X1/SvJ-Tg(Th-  
455 *MYCN*)41Waw/Nci). These tumours closely recapitulate many of the clinical and genomic  
456 features of high-risk neuroblastoma disease [26, 37]. We observed near complete reduction in  
457 tumour volume by MR imaging after 7 days of indisulam treatment compared to vehicle  
458 control (Fig. 7a-c). Importantly, no tumour relapse was reported over a period of more than  
459 124 days (n=5) exemplifying the absence of recurrence (Fig. 7c). One animal in the treated  
460 group died at day 7, where the autopsy revealed no evidence of residual tumour but a bowel  
461 obstruction. Together these data indicate that indisulam may be a highly efficacious  
462 therapeutic agent for high-risk neuroblastoma.

463

## 464 **Discussion**

465 Until recently the key molecular event determining the anti-tumour activity of aryl  
466 sulphonamides, selective RBM39 degradation, was unknown and predictive biomarkers for  
467 therapy response unavailable. Since that discovery, a number of studies have detailed the  
468 structural basis of interactions between aryl sulphonamides, DCAF15 and RBM39, creating

469 both opportunities for the generation of novel protein degrading therapeutics based on  
470 DCAF15 targeting as well as new interest in RBM39 as an emerging anti-cancer target.

471 To the best of our knowledge, of the 47 clinical trials [Xu et al., 2020, in review] that have  
472 used indisulam or a related aryl sulphonamide, none have tested the efficacy of these  
473 compounds in patients with neuroblastoma. This is despite apparent evidence from public  
474 datasets demonstrating that neuroblastoma cell lines, together with a number of lymphoma  
475 and leukaemia models, exhibit high susceptibility to indisulam treatment (Figure 1, [31]).  
476 While recent studies in primary AML cells have confirmed this responsiveness [38]  
477 additional pre-clinical evidence for treatment of neuroblastoma was lacking.

478 Here, we have shown that aryl-sulphonamides are a viable and potent therapeutic strategy  
479 using multiple *in vivo* and *in vitro* neuroblastoma models including a transgenic mouse model  
480 of *MYCN*-driven, high-risk disease. Significantly, while indisulam has been assessed in a  
481 wide range of xenograft models including SW [25], LX-1, PC9, HCT15, HCT116 [6] and  
482 MML-AF9 leukemia cells [38], none modelled neuroblastoma and all previous experiments  
483 showed relapse after initial tumour regression once treatment was withdrawn. In contrast, we  
484 observe complete tumour response with prolonged remission after cessation of therapy,  
485 strongly underlining the fact that high-risk neuroblastoma may be particularly sensitive to  
486 indisulam.

487 Another novel aspect of our findings is the recognition that aryl sulphonamides may cause  
488 broad metabolic deficiencies and growth inhibition in cancer cells via the mechanism of  
489 RBM39 depletion and mis-splicing of specific genes which regulate metabolism and cell  
490 cycle. Although indisulam-induced depletion of RBM39 was previously reported to cause  
491 widespread RNA mis-splicing, these events are far from random. RBM39 knockdown  
492 coupled to CLIP-seq has indicated that RBM39 regulates a distinct set of splicing events from  
493 that of closely related spliceosomal factors U2AF65 and PUF60, enriched in cell cycle, RNA  
494 processing and metabolic pathway genes [21]. Specifically, we demonstrated that loss of  
495 RBM39 by either pharmacological or gene silencing is consistently associated with RNA  
496 splicing errors and reduced protein expression of critical factors for proliferation such as  
497 CDK4 and TYMS across different cell backgrounds. Targeted interference against CDK4/6  
498 has been previously shown to cause G1 arrest in neuroblastoma [39], in part phenocopying  
499 indisulam. Indeed, we have recently shown that targeting cell cycle proteins (such as  
500 CDK2/9) are an increasingly important strategy for therapeutic developments in



501 neuroblastoma [40]. Likewise, silencing of RBM39 can reproduce several of the metabolic  
502 disruptions that we observe, such as a loss of oxidative metabolic capacity, altered redox  
503 balance and increases in serine and glycine, consistent with our findings [22]. As the  
504 serine/glycine/one-carbon metabolic pathway is closely linked to pyrimidine metabolism it is  
505 plausible that mis-splicing of TYMS activity could explain these observations, although  
506 CDK4 loss itself can reduce TYMS expression in a cell cycle independent manner [41].  
507 Importantly, we confirm that these specific pharmacodynamic events translate to the *in vivo*  
508 setting, paving the way for their use as biomarkers for early evaluation of therapeutic  
509 response in clinic.

510 While we cannot rule out other RBM39-independent pathways contributing to indisulam-  
511 induced metabolic perturbations, such as the known inhibition of carbonic anhydrases by aryl  
512 sulphonamides in cell-free systems [36], the depletion of RBM39 appears to precede all other  
513 major molecular events and to be necessary for full efficacy. Overall, our data suggest that  
514 the loss of specific gene products downstream of RBM39 depletion, rather than global failure  
515 of the spliceosome, may best explain the toxicological sequelae of indisulam exposure and  
516 the variability in response in different tumours. With DCAF15 expression being an important  
517 determinant of sensitivity to indisulam [14, 15], high levels of DCAF15 in cells of  
518 neuroblastoma origin (Suppl. Fig. S3) might in part account for the high susceptibility of  
519 neuroblastoma to indisulam treatment observed in our current study. However, although our  
520 data support the hypothesis that DCAF15 expression is necessary for RBM39-depletion and  
521 anti-tumour activity of indisulam, a recent study suggested that DCAF15 levels in primary  
522 samples of tumour cells of AML patients did not correlate to RBM39 degradation [42],  
523 highlighting the need for additional predictive and pharmacodynamic biomarkers.

524 Amplification of the transcription factor N-Myc, which along with high c-Myc expression is  
525 frequently observed in high-risk neuroblastoma, leads to an increased oncogenic  
526 transcriptional program [43] whereby cells may rely more heavily on rapid and correct pre-  
527 mRNA processing and alternative splicing; thus the spliceosome has been described as the  
528 ‘Achilles heel’ of Myc-driven tumours [44]. For example it has been reported that N-Myc  
529 directly regulates an alternative splicing program by mediating splicing factor expression in  
530 high-risk neuroblastoma [45]. Protein degradation, whether through proteolysis targeting  
531 chimeras (PROTACS) or molecular glues like indisulam offer a new route to therapeutic  
532 targeting of spliceosomal components that may be difficult to drug due to lack of  
533 conventional active sites [46]. Interestingly, MYCN-amplified tumours are also more likely

534 to be sensitive to dual CDK4/6 inhibition [39] and plausibly therefore may also be more  
535 sensitive to CDK4 downregulation downstream of indisulam exposure and RBM39 depletion.  
536 Furthermore, N-Myc amplification reprogrammes metabolism in several ways including the  
537 serine-glycine synthesis and one-carbon metabolic pathway [47] and reactive oxygen species  
538 (ROS) production in neuroblastoma [48]. Combined, the increased dependency of  
539 neuroblastoma cells on metabolic reprogramming and RNA processing as a result of high N-  
540 Myc/c-Myc activity might be important factors that explain the sensitivity of high-risk  
541 neuroblastoma to indisulam.

542 Altogether, this study demonstrates high-risk neuroblastoma may be particularly sensitive to  
543 the dual targeting of metabolism and RNA splicing by the aryl sulphonamide indisulam.  
544 Since clinical PK data already exist and because treatment is well-tolerated in many patients,  
545 indisulam is a therapeutic that could be rapidly repurposed for clinical trials in high-risk  
546 neuroblastoma patients. Molecular profiling has revealed several specific gene and pathway  
547 level effects that could explain the high vulnerability of neuroblastoma to indisulam. The  
548 gene, protein and metabolite biomarkers identified in this study, in addition to DCAF15,  
549 provide a solid basis for confirming target engagement, monitoring early response to  
550 treatment and, in the future, for personalised therapy. Further studies on the essentiality of  
551 RBM39 and how cells may compensate for RBM39 loss could further optimise therapeutic  
552 targeting of RBM39 and accelerate biomarker-driven clinical trials.

553

554 **FIGURES**

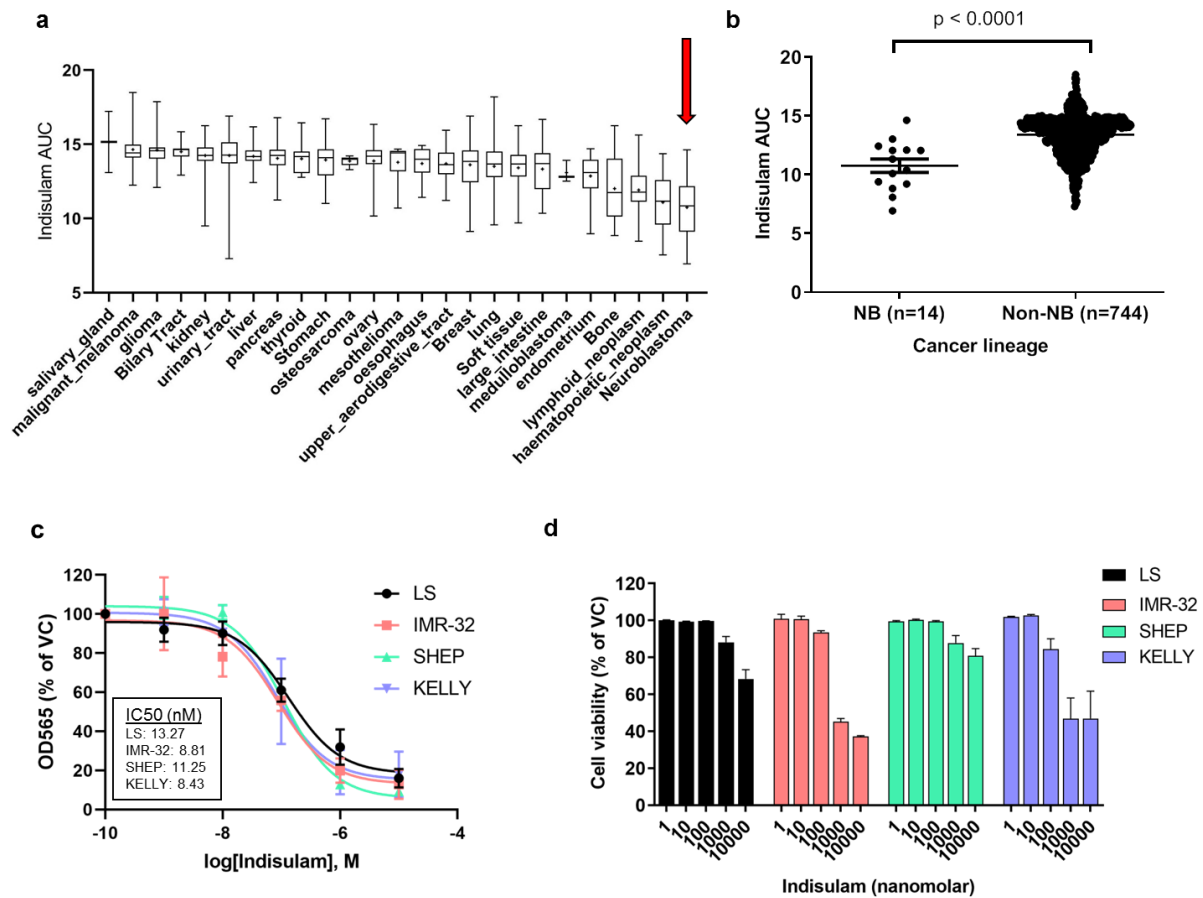

555 **Figure 1. Indisulam is efficacious in *in vitro* models of neuroblastoma.** **a** Indisulam area-  
 556 under-curve (AUC) in cell lines from 25 tumour origins. **b** Indisulam area-under-curve  
 557 (AUC) of 14 neural-crest derived neuroblastoma (NB) compared to non-NB cell lines (all  
 558 other cancer lineages). Each circle represents one cell line. Mann-Whitney test,  $p < 0.0001$ .  
 559 Data was acquired from the CTD2 network [31]. **c** Cells were treated with a 5-point dose-  
 560 response of indisulam or vehicle control (0.1% DMSO) for 72hr. Cell growth determined  
 561 assessed by SRB assay (n=3, mean +/- SD). **d** Cells were treated with indisulam or vehicle  
 562 control (0.1% DMSO) for 72hr and cell viability was measured and normalised to the vehicle  
 563 control (n=2 for LS and IMR-32 and n=3 for SHEP, KELLY).

564

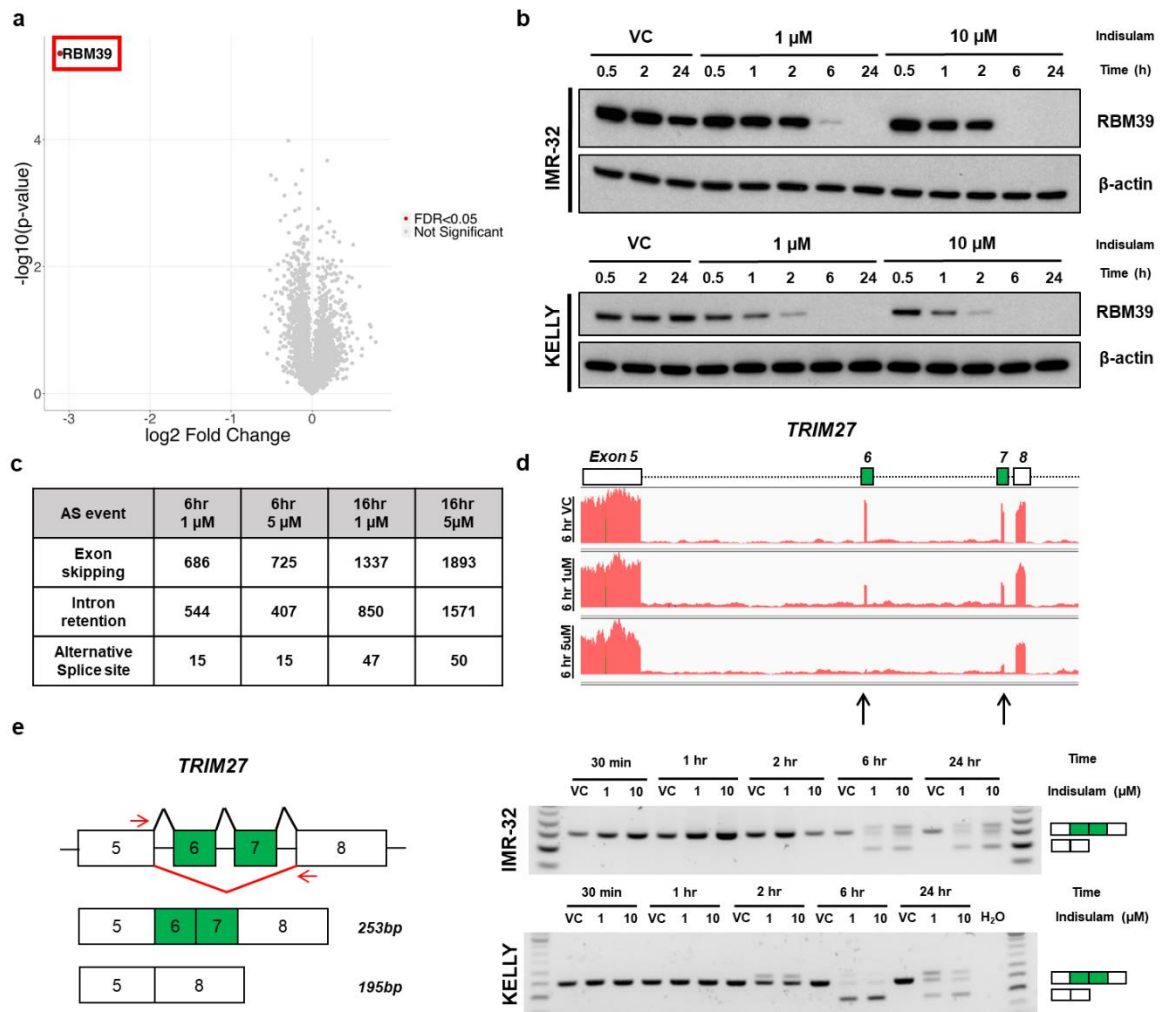

565 **Figure 2. Indisulam causes selective degradation of RBM39 and subsequent mis-**  
 566 **splicing. a** Label-free proteomics of IMR-32 treated with 5μM indisulam or vehicle (VC,  
 567 0.1% DMSO). RBM39 selectively degraded 6hr post treatment. **b** KELLY and IMR-32 cells  
 568 treated with VC, 1μM or 10μM indisulam for 0.5 to 24hr. Complete RBM39 degradation  
 569 post 6hr of treatment in both cell lines. **c** RNAseq analysis of IMR-32 cells treated 5μM  
 570 indisulam or VC (0.1% DMSO) for 6 or 16hr. Indisulam caused many exon skipping and  
 571 intron retention events. **d** Read counts of *TRIM27* depict loss of exon 6 and 7 following  
 572 indisulam (black arrows). **e** Indisulam causes skipping of exon 6 and 7 and skipping in both  
 573 IMR-32 and KELLY cells, post RBM39 degradation.

574

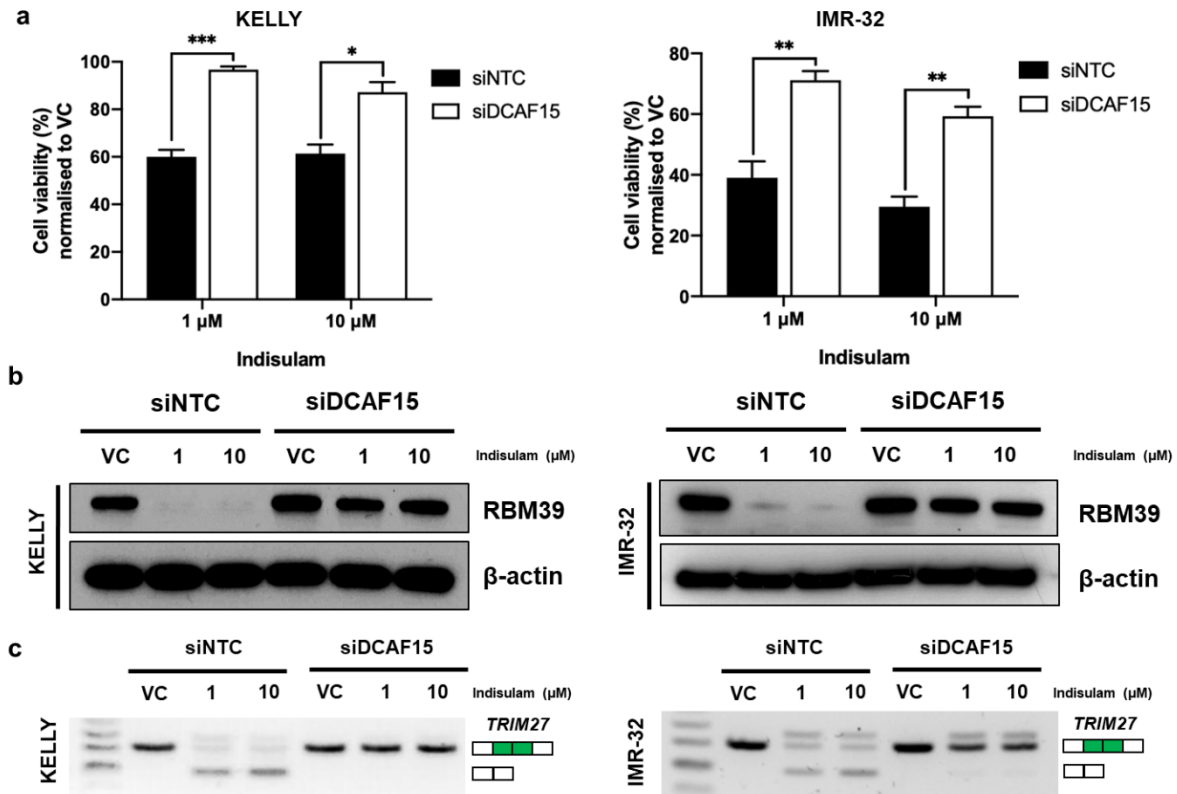

575 **Figure 3. Indisulam causes RBM39 degradation, loss of cell viability and mis-splicing in**  
 576 **a DCAF15-dependent manner. a** KELLY and IMR-32 cells transfected with control siRNA  
 577 (siNTC) or siRNA against DCAF15 (siDCAF15) and treated with vehicle or indisulam for  
 578 72hr and cell viability measured. **b** Western blot for RBM39 post-indisulam treatment in  
 579 KELLY and IMR-32 cells transfected with siNTC or siDCAF15. **c** *TRIM27* mis-splicing post  
 580 indisulam treatment in KELLY and IMR-32 cells transfected with siNTC or siDCAF15. Bars  
 581 represent mean +/- SD from three independent experiments. \*p<0.05, \*\*p<0.01 unpaired t-  
 582 test.

583

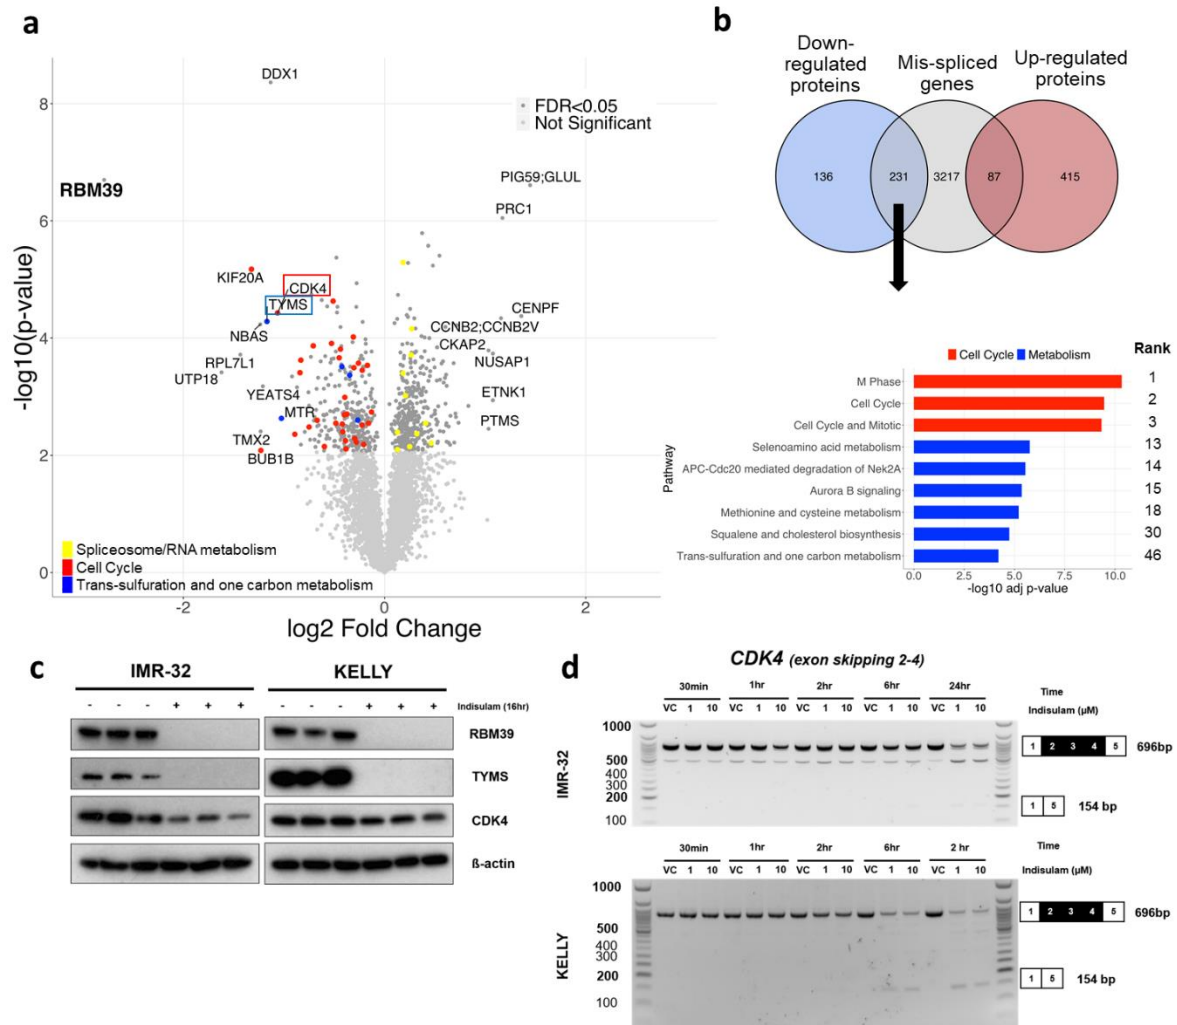

584

585 **Figure 4. Indisulam-mediated RBM39 degradation leads to loss of proteins that regulate**  
 586 **cell cycle and metabolism. a** Label-free proteomics of IMR-32 treated with 5 $\mu$ M indisulam  
 587 or VC (0.1% DMSO) for 16hr. **b** Overlap of splicing events (exon skipping and intron  
 588 retention) with up or down-regulated proteins after 16hr of indisulam treatment. Gene  
 589 ontology analysis of mis-spliced down-regulated proteins highlights cell cycle and various  
 590 metabolic pathways. Full table in supplementary data. **c** Western blot confirming the  
 591 reduction of TYMS and CDK4 in IMR-32 and KELLY treated with indisulam or vehicle for  
 592 16hr. **d** Indisulam causes time and dose-dependent skipping of exon 2 to 4 of *CDK4* in both  
 593 IMR-32 and KELLY cells, post RBM39 degradation.

594

595

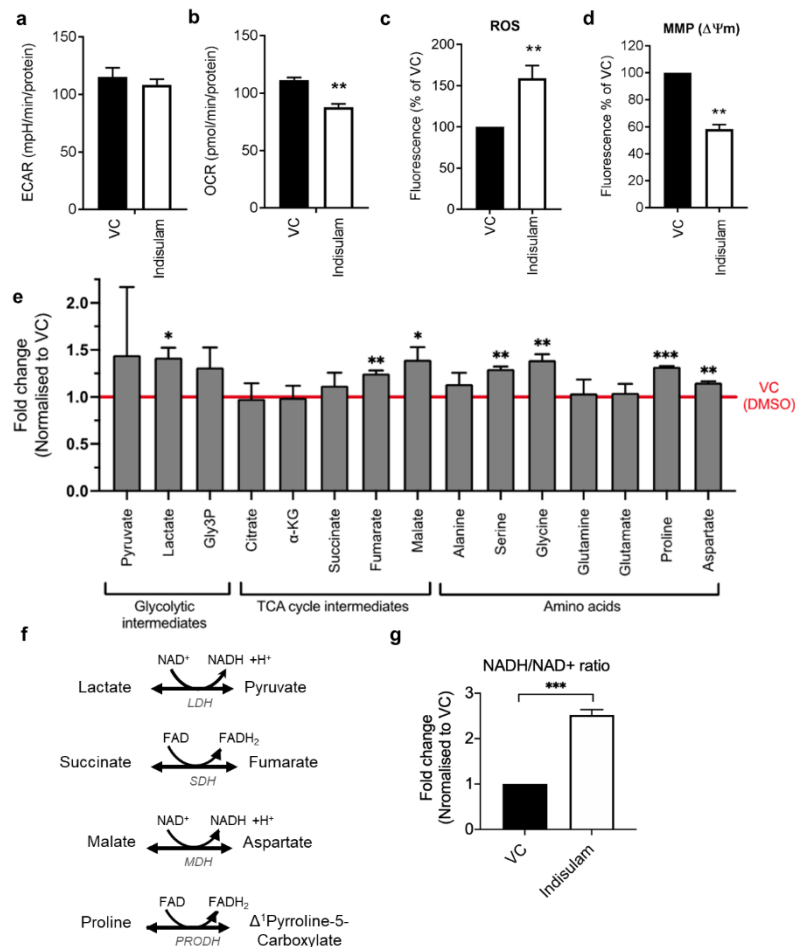

596

597 **Figure 5. Indisulam disrupts cellular metabolism.** **a** Extracellular acidification rate  
 598 (ECAR) and **b** oxygen consumption rate (OCR) of IMR-32 cells after 1hr of treatment with  
 599 10 $\mu$ M indisulam. \*\* $p < 0.01$  unpaired t-test. **c** ROS levels of IMR-32 cells after 72hr of  
 600 treatment with 100nM indisulam. ROS production was measured by DCFDA fluorescence  
 601 emission at 535 nm. % of vehicle control fluorescence is shown. \*\* $p < 0.01$  one-sample t-test.  
 602 **d** The mitochondrial membrane potential (MMP) of IMR-32 cells after 6hr of treatment with  
 603 10 $\mu$ M indisulam. MMP was measured by JC-1 aggregate fluorescence emission at 590 nm. %  
 604 of vehicle control fluorescence is shown. \*\* $p > 0.01$  one-sample t-test. **e** LC-MS/MS profiling  
 605 of IMR-32 cells after 6hr of treatment with indisulam (10 $\mu$ M). Data are normalised to vehicle  
 606 control (VC, 0.1% DMSO) which is marked by a red line. \* $p < 0.05$ , \*\* $p < 0.01$ , \*\*\* $p < 0.001$   
 607 unpaired t-test. **f** Schematic of enzymatic reactions involving the conversion of NAD<sup>+</sup> to  
 608 NADH or FAD to FADH. **g** Ratio of NADH/NAD<sup>+</sup> after 6hr treatment with indisulam  
 609 (10 $\mu$ M) or vehicle control. \*\*\* $p < 0.001$ , unpaired t-test. All vehicle controls are 0.1% DMSO.  
 610 All bars represent mean  $\pm$  SD.

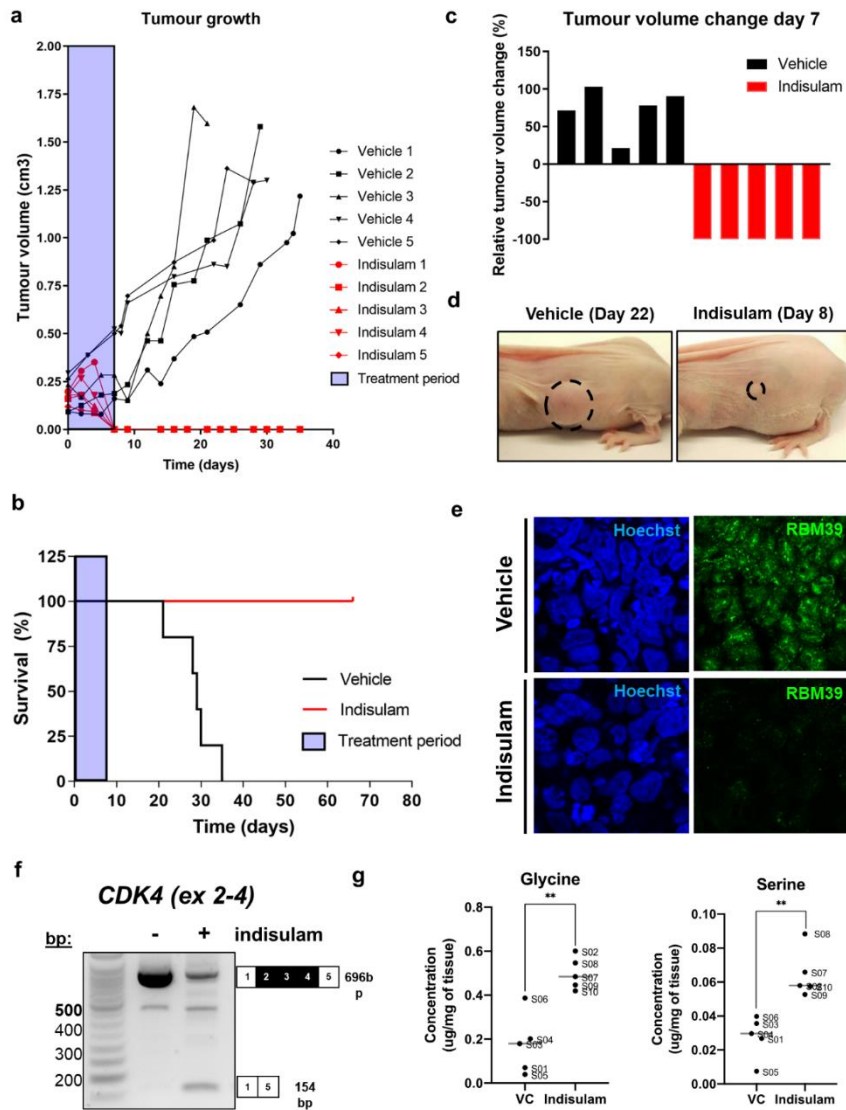

611

612 **Figure 6. Indisulam is efficacious and causes RBM39 depletion, RNA mis-splicing and**  
 613 **metabolic perturbations in neuroblastoma *in vivo*.** **a** Tumour growth in mice bearing IMR-  
 614 32 xenografts treated with either vehicle (n=5) or indisulam (n=5) for eight days. Tumour  
 615 volume measured every 2-3 days. **b** Survival plot of mice bearing IMR-32 xenografts. **c**  
 616 Waterfall plot showing relative changes in tumour volume of xenografts at day 7. **d**  
 617 Representative images of IMR-32 xenografts treated with vehicle (day 22) or indisulam (day  
 618 8). **e-g** IMR-32 xenografts bearing mice were treated with vehicle or indisulam for 4 days to  
 619 assess pharmacodynamic markers and metabolism in tumours. **e** RBM39 degradation  
 620 determined by immunofluorescence on fixed tissues. **f** Exon skipping of *CDK4* in RNA  
 621 extracted from IMR-32 xenograft tumours. **g** Glycine and serine changes detected by GC-MS  
 622 of xenograft tumour tissues (n=5 per group). \*\*p<0.01, unpaired t-test.



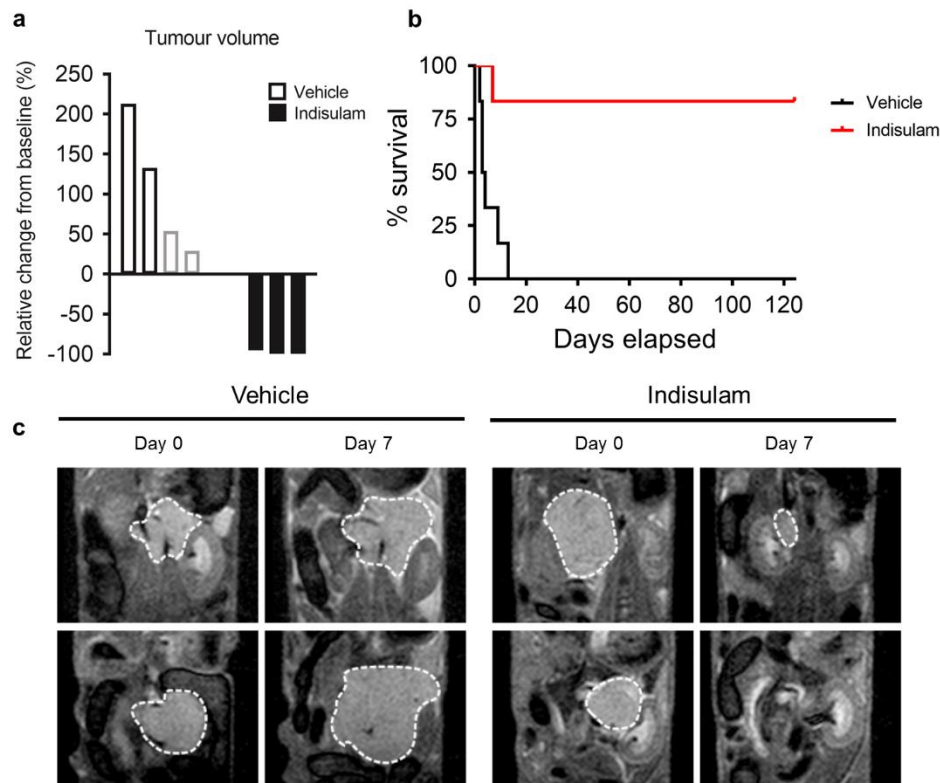

623 **Figure 7. Indisulam is efficacious in a Th-MYCN transgenic mouse of neuroblastoma.**

624 **a** Waterfall plot showing the relative changes in tumour volume in the Th-MYCN transgenic  
625 mice treated for seven days with indisulam (n=3) or vehicle control (n=4) measured by MRI.

626 Note that the mice represented by the grey bars reached the tumour size study endpoint  
627 (palpation) before their Day 7 MRI scan and the data shown for these two mice are the

628 relative changes in volume following at day 3 of treatment with indisulam. **b** Survival of mice  
629 treated with vehicle (n=6) or indisulam (n=6). One mouse in indisulam treated group died on

630 day 7. Autopsy revealed no presence of tumour but evidence of bowel obstruction.

631 **c** Representative anatomical coronal T<sub>2</sub>-weighted MRI of the abdomen of Th-MYCN mice  
632 prior (day 0) and following seven days of treatment with indisulam or vehicle control.

633 Dashed white line indicates the tumour circumference.

634

635 **REFERENCES**

- 636 1. London, W.B., et al., *Clinical and biologic features predictive of survival after*  
637 *relapse of neuroblastoma: a report from the International Neuroblastoma Risk Group*  
638 *project*. J Clin Oncol, 2011. **29**(24): p. 3286-92.
- 639 2. Colon, N.C. and D.H. Chung, *Neuroblastoma*. Adv Pediatr, 2011. **58**(1): p. 297-311.
- 640 3. Owa, T., et al., *Discovery of novel antitumor sulfonamides targeting G1 phase of the*  
641 *cell cycle*. J Med Chem, 1999. **42**(19): p. 3789-99.
- 642 4. Yoshino, H., et al., *Novel sulfonamides as potential, systemically active antitumor*  
643 *agents*. J Med Chem, 1992. **35**(13): p. 2496-7.
- 644 5. Fukuoka, K., et al., *Mechanisms of action of the novel sulfonamide anticancer agent*  
645 *E7070 on cell cycle progression in human non-small cell lung cancer cells*. Invest  
646 *New Drugs*, 2001. **19**(3): p. 219-27.
- 647 6. Ozawa, Y., et al., *E7070, a novel sulphonamide agent with potent antitumour activity*  
648 *in vitro and in vivo*. Eur J Cancer, 2001. **37**(17): p. 2275-82.
- 649 7. Raymond, E., et al., *Phase I and pharmacokinetic study of E7070, a novel*  
650 *chloroindolyl sulfonamide cell-cycle inhibitor, administered as a one-hour infusion*  
651 *every three weeks in patients with advanced cancer*. J Clin Oncol, 2002. **20**(16): p.  
652 3508-21.
- 653 8. Terret, C., et al., *Phase I clinical and pharmacokinetic study of E7070, a novel*  
654 *sulfonamide given as a 5-day continuous infusion repeated every 3 weeks in patients*  
655 *with solid tumours. A study by the EORTC Early Clinical Study Group (ECSG)*. Eur J  
656 *Cancer*, 2003. **39**(8): p. 1097-104.
- 657 9. Dittrich, C., et al., *Phase I and pharmacokinetic study of E7070, a chloroindolyl-*  
658 *sulfonamide anticancer agent, administered on a weekly schedule to patients with*  
659 *solid tumors*. Clin Cancer Res, 2003. **9**(14): p. 5195-204.
- 660 10. Haddad, R.I., et al., *A phase II clinical and pharmacodynamic study of E7070 in*  
661 *patients with metastatic, recurrent, or refractory squamous cell carcinoma of the*  
662 *head and neck: modulation of retinoblastoma protein phosphorylation by a novel*  
663 *chloroindolyl sulfonamide cell cycle inhibitor*. Clin Cancer Res, 2004. **10**(14): p.  
664 4680-7.
- 665 11. Punt, C.J., et al., *Phase I and pharmacokinetic study of E7070, a novel sulfonamide,*  
666 *given at a daily times five schedule in patients with solid tumors. A study by the*  
667 *EORTC-early clinical studies group (ECSG)*. Ann Oncol, 2001. **12**(9): p. 1289-93.
- 668 12. Talbot, D.C., et al., *A randomized phase II pharmacokinetic and pharmacodynamic*  
669 *study of indisulam as second-line therapy in patients with advanced non-small cell*  
670 *lung cancer*. Clin Cancer Res, 2007. **13**(6): p. 1816-22.
- 671 13. Yamada, Y., et al., *Phase I pharmacokinetic and pharmacogenomic study of E7070*  
672 *administered once every 21 days*. Cancer Sci, 2005. **96**(10): p. 721-8.
- 673 14. Han, T., et al., *Anticancer sulfonamides target splicing by inducing RBM39*  
674 *degradation via recruitment to DCAF15*. Science, 2017. **356**(6336).
- 675 15. Uehara, T., et al., *Selective degradation of splicing factor CAPERalpha by anticancer*  
676 *sulfonamides*. Nat Chem Biol, 2017. **13**(6): p. 675-680.
- 677 16. Dowhan, D.H., et al., *Steroid hormone receptor coactivation and alternative RNA*  
678 *splicing by U2AF65-related proteins CAPERalpha and CAPERbeta*. Mol Cell, 2005.  
679 **17**(3): p. 429-39.
- 680 17. Stepanyuk, G.A., et al., *UHM-ULM interactions in the RBM39-U2AF65 splicing-*  
681 *factor complex*. Acta Crystallogr D Struct Biol, 2016. **72**(Pt 4): p. 497-511.

- 682 18. Loerch, S., et al., *Cancer-relevant splicing factor CAPERalpha engages the essential*  
683 *splicing factor SF3b155 in a specific ternary complex*. J Biol Chem, 2014. **289**(25): p.  
684 17325-37.
- 685 19. Dutta, J., G. Fan, and C. Gelinas, *CAPERalpha is a novel Rel-TAD-interacting factor*  
686 *that inhibits lymphocyte transformation by the potent Rel/NF-kappaB oncoprotein v-*  
687 *Rel*. J Virol, 2008. **82**(21): p. 10792-802.
- 688 20. Jung, D.J., et al., *Molecular cloning and characterization of CAPER, a novel*  
689 *coactivator of activating protein-1 and estrogen receptors*. J Biol Chem, 2002.  
690 **277**(2): p. 1229-34.
- 691 21. Mai, S., et al., *Global regulation of alternative RNA splicing by the SR-rich protein*  
692 *RBM39*. Biochim Biophys Acta, 2016. **1859**(8): p. 1014-24.
- 693 22. Kang, Y.K., et al., *CAPER is vital for energy and redox homeostasis by integrating*  
694 *glucose-induced mitochondrial functions via ERR-alpha-Gabpa and stress-induced*  
695 *adaptive responses via NF-kappaB-cMYC*. PLoS Genet, 2015. **11**(4): p. e1005116.
- 696 23. Workman, P., et al., *Guidelines for the welfare and use of animals in cancer research*.  
697 Br J Cancer, 2010. **102**(11): p. 1555-77.
- 698 24. Kilkenny, C., et al., *Improving bioscience research reporting: the ARRIVE guidelines*  
699 *for reporting animal research*. Vet Clin Pathol, 2012. **41**(1): p. 27-31.
- 700 25. Ozawa, Y., et al., *Therapeutic potential and molecular mechanism of a novel*  
701 *sulfonamide anticancer drug, indisulam (E7070) in combination with CPT-11 for*  
702 *cancer treatment*. Cancer Chemother Pharmacol, 2012. **69**(5): p. 1353-62.
- 703 26. Weiss, W.A., et al., *Targeted expression of MYCN causes neuroblastoma in*  
704 *transgenic mice*. EMBO J, 1997. **16**(11): p. 2985-95.
- 705 27. Behrends, V., G.D. Tredwell, and J.G. Bundy, *A software complement to AMDIS for*  
706 *processing GC-MS metabolomic data*. Anal Biochem, 2011. **415**(2): p. 206-8.
- 707 28. Kind, T., et al., *FiehnLib: mass spectral and retention index libraries for*  
708 *metabolomics based on quadrupole and time-of-flight gas chromatography/mass*  
709 *spectrometry*. Anal Chem, 2009. **81**(24): p. 10038-48.
- 710 29. Stein, S.E., *An integrated method for spectrum extraction and compound*  
711 *identification from gas chromatography/mass spectrometry data*. Journal of the  
712 American Society for Mass Spectrometry, 1999. **10**(8): p. 770-781.
- 713 30. Wisniewski, J.R., et al., *Universal sample preparation method for proteome analysis*.  
714 Nat Methods, 2009. **6**(5): p. 359-62.
- 715 31. Rees, M.G., et al., *Correlating chemical sensitivity and basal gene expression reveals*  
716 *mechanism of action*. Nat Chem Biol, 2016. **12**(2): p. 109-16.
- 717 32. Perez-Riverol, Y., et al., *The PRIDE database and related tools and resources in*  
718 *2019: improving support for quantification data*. Nucleic Acids Res, 2019. **47**(D1): p.  
719 D442-D450.
- 720 33. Edgar, R., M. Domrachev, and A.E. Lash, *Gene Expression Omnibus: NCBI gene*  
721 *expression and hybridization array data repository*. Nucleic Acids Res, 2002. **30**(1):  
722 p. 207-10.
- 723 34. Braunschweig, U., et al., *Widespread intron retention in mammals functionally tunes*  
724 *transcriptomes*. Genome Res, 2014. **24**(11): p. 1774-86.
- 725 35. Bussiere, D.E., et al., *Structural basis of indisulam-mediated RBM39 recruitment to*  
726 *DCAF15 E3 ligase complex*. Nat Chem Biol, 2020. **16**(1): p. 15-23.
- 727 36. Abbate, F., et al., *Carbonic anhydrase inhibitors: E7070, a sulfonamide anticancer*  
728 *agent, potently inhibits cytosolic isozymes I and II, and transmembrane, tumor-*  
729 *associated isozyme IX*. Bioorg Med Chem Lett, 2004. **14**(1): p. 217-23.

- 730 37. Chesler, L. and W.A. Weiss, *Genetically engineered murine models--contribution to*  
731 *our understanding of the genetics, molecular pathology and therapeutic targeting of*  
732 *neuroblastoma*. *Semin Cancer Biol*, 2011. **21**(4): p. 245-55.
- 733 38. Wang, E., et al., *Targeting an RNA-Binding Protein Network in Acute Myeloid*  
734 *Leukemia*. *Cancer Cell*, 2019. **35**(3): p. 369-384 e7.
- 735 39. Rader, J., et al., *Dual CDK4/CDK6 inhibition induces cell-cycle arrest and*  
736 *senescence in neuroblastoma*. *Clin Cancer Res*, 2013. **19**(22): p. 6173-82.
- 737 40. Poon, E., et al., *Orally bioavailable CDK9/2 inhibitor shows mechanism-based*  
738 *therapeutic potential in MYCN-driven neuroblastoma*. *J Clin Invest*, 2020.
- 739 41. Le Francois, B.G., J.A. Maroun, and H.C. Birnboim, *Expression of thymidylate*  
740 *synthase in human cells is an early G(1) event regulated by CDK4 and p16INK4A but*  
741 *not E2F*. *Br J Cancer*, 2007. **97**(9): p. 1242-50.
- 742 42. Hsiehchen, D., et al., *Biomarkers for RBM39 degradation in acute myeloid leukemia*.  
743 *Leukemia*, 2020.
- 744 43. Burgess, D.J., *MYC provides a global boost*. *Nature Reviews Genetics*, 2012. **13**(11):  
745 p. 758-758.
- 746 44. Anczukow, O. and A.R. Krainer, *The spliceosome, a potential Achilles heel of MYC-*  
747 *driven tumors*. *Genome Med*, 2015. **7**: p. 107.
- 748 45. Zhang, S., et al., *MYCN controls an alternative RNA splicing program in high-risk*  
749 *metastatic neuroblastoma*. *Cancer Lett*, 2016. **371**(2): p. 214-24.
- 750 46. Toure, M. and C.M. Crews, *Small-Molecule PROTACS: New Approaches to Protein*  
751 *Degradation*. *Angew Chem Int Ed Engl*, 2016. **55**(6): p. 1966-73.
- 752 47. Xia, Y., et al., *Metabolic Reprogramming by MYCN Confers Dependence on the*  
753 *Serine-Glycine-One-Carbon Biosynthetic Pathway*. *Cancer Res*, 2019. **79**(15): p.  
754 3837-3850.
- 755 48. Wang, T., et al., *MYCN drives glutaminolysis in neuroblastoma and confers*  
756 *sensitivity to an ROS augmenting agent*. *Cell Death Dis*, 2018. **9**(2): p. 220.

757

## 758 **Acknowledgements**

759 This work was funded by the Imperial College Medical Research Council (MRC) Doctoral  
760 Training Programme (DTP), grant number: MR/K501281 and by MetaCELL-TM H2020 Fast  
761 Track to Innovation (737978). Infrastructure for this research was supported by the Imperial  
762 Experimental Cancer Medicine Centre and the Cancer Research UK Imperial Centre as well  
763 as the National Institute for Health Research (NIHR) Imperial Biomedical Research Centre  
764 (including the Imperial Genomics Facility). Cancer Research UK also support the Cancer  
765 Imaging Centre at ICR, in association with the MRC and Department of Health (England)  
766 (C1060/A16464). O.Y., E.P., B.M.C., and L.C. are funded by Cancer Research UK  
767 (C34648/A18339 and C34648/A28278). Y.J. is a Children with Cancer UK Research  
768 Fellow (2014/176). A.N. is funded through an AstraZeneca/Imperial College Research  
769 Fellowship (2019).

770

## 771 **Author contributions**

772 A.N., A.S., O.Y., Y.J., L.C., and H.C.K., conceived the study, designed the experiments and  
773 interpreted data. A.N., A.S., L.H., E.P., Y.L., acquired data from cellular experiments with  
774 the guidance of A.B. and E.W. on methodology. O.Y., Y.J. and B.M.C. performed and  
775 acquired data from *in vivo* experiments, including imaging. H.K. and A.M. performed  
776 proteomics and processing of data with the guidance of D.C. on methodology. A.S. L.H. and  
777 E. K. performed mass spectrometry of *in vitro* and *in vivo* samples, processed and analysed  
778 data. C.E. and G.V. analysed RNAseq and proteomics data. All authors contributed to the  
779 writing and editing of the manuscript.

780

781 **Competing interests**

782 All authors declare no competing interests

Supplementary.

| p-value  | q-value    | pathway                                             | source   |
|----------|------------|-----------------------------------------------------|----------|
| 7.38E-12 | 3.34E-09   | M Phase                                             | Reactome |
| 8.48E-10 | 1.55E-07   | Cell Cycle                                          | Reactome |
| 1.02E-09 | 1.55E-07   | Cell Cycle, Mitotic                                 | Reactome |
| 9.47E-09 | 9.63E-07   | Mitotic Prometaphase                                | Reactome |
| 1.06E-08 | 9.63E-07   | Separation of Sister Chromatids                     | Reactome |
| 2.68E-08 | 1.65E-06   | Mitotic Anaphase                                    | Reactome |
| 2.78E-08 | 1.65E-06   | Mitotic Spindle Checkpoint                          | Reactome |
| 2.91E-08 | 1.65E-06   | Mitotic Metaphase and Anaphase                      | Reactome |
| 9.04E-08 | 4.55E-06   | Consensation of Prometaphase Chromosomes            | Reactome |
| 2.07E-07 | 9.38E-06   | Aurora B signaling                                  | PID      |
| 8.91E-07 | 3.67E-05   | Importin-mediated nuclear import of PIC             | Reactome |
| 9.77E-07 | 3.69E-05   | Aminosugars metabolism                              | EHMN     |
| 1.55E-06 | 5.08E-05   | Interactions of Vpr with host cellular proteins     | Reactome |
| 1.57E-06 | 5.08E-05   | Methionine and cysteine metabolism                  | EHMN     |
| 1.85E-06 | 5.21E-05   | Selenoamino acid metabolism                         | EHMN     |
| 2.15E-06 | 5.21E-05   | APC/C via direct inhibition of the APC              | Reactome |
| 2.15E-06 | 5.21E-05   | APC/C required for the onset of anaphase            | Reactome |
| 2.16E-06 | 5.21E-05   | Resolution of Sister Chromatid Cohesion             | Reactome |
| 2.23E-06 | 5.21E-05   | Cell Cycle Checkpoints                              | Reactome |
| 2.30E-06 | 5.21E-05   | Importin-dependent Golgi-to-ER retrograde transport | Reactome |
| 6.67E-06 | 0.00014384 | Cdc20 mediated degradation of Ndc80                 | Reactome |
| 7.57E-06 | 0.00014902 | Export from unattached kinetochores via APC         | Reactome |
| 7.57E-06 | 0.00014902 | Amplification of signal from the kinetochore        | Reactome |
| 9.80E-06 | 0.00018488 | Importin-phospho-APC/C mediated degradation         | Reactome |
| 1.17E-05 | 0.00021266 | Export of cell cycle proteins prior to satisfaction | Reactome |
| 1.28E-05 | 0.00021814 | tRNA processing                                     | Reactome |
| 1.40E-05 | 0.00021814 | Export of Ribonucleoproteins into the Host Cell     | Reactome |
| 1.40E-05 | 0.00021814 | Inhibits Glucokinase by Glucokinase Regulation      | Reactome |
| 1.40E-05 | 0.00021814 | Interacts with the Cellular Export Machinery        | Reactome |
| 1.65E-05 | 0.00024125 | Cdc20 mediated degradation of mitotic               | Reactome |
| 1.65E-05 | 0.00024125 | Export of Viral Ribonucleoproteins from Nucleus     | Reactome |
| 1.94E-05 | 0.00027437 | Importin-dependent APC/C:Cdc20 mediated degradation | Reactome |
| 2.00E-05 | 0.00027437 | Mitotic Prophase                                    | Reactome |
| 2.27E-05 | 0.00029347 | Export of the SLBP independent Mature               | Reactome |
| 2.27E-05 | 0.00029347 | Importin-mediated nuclear export of HIV Rev         | Reactome |
| 2.64E-05 | 0.00031423 | Nuclear import of Rev protein                       | Reactome |
| 2.64E-05 | 0.00031423 | Export of the SLBP Dependant Mature                 | Reactome |
| 2.64E-05 | 0.00031423 | Nuclear Pore Complex (NPC) Disassembly              | Reactome |
| 2.87E-05 | 0.00033375 | tRNA processing in the nucleus                      | Reactome |
| 2.98E-05 | 0.00033571 | Cellular responses to external stimuli              | Reactome |
| 3.04E-05 | 0.00033571 | Golgi-to-ER retrograde transport                    | Reactome |
| 3.51E-05 | 0.00037872 | APC/C activators between G1/S and                   | Reactome |

|            |            |                                       |              |
|------------|------------|---------------------------------------|--------------|
| 4.03E-05   | 0.00040527 | qualene and cholesterol biosynthes    | EHMN         |
| 4.03E-05   | 0.00040527 | MOylation of DNA replication prote    | Reactome     |
| 4.03E-05   | 0.00040527 | actions of Rev with host cellular pro | Reactome     |
| 4.63E-05   | 0.00045602 | RHO GTPases Activate Formins          | Reactome     |
| 5.54E-05   | 0.00053353 | phatidylinositol phosphate metabo     | EHMN         |
| 5.92E-05   | 0.00055917 | ature mRNA Derived from an Intro      | Reactome     |
| 6.69E-05   | 0.00059433 | mediated degradation of cell cycle    | Reactome     |
| 6.69E-05   | 0.00059433 | Regulation of mitotic cell cycle      | Reactome     |
| 6.69E-05   | 0.00059433 | ature mRNAs Derived from Introni      | Reactome     |
| 6.97E-05   | 0.00060691 | Cellular responses to stress          | Reactome     |
| 7.53E-05   | 0.00064373 | Viral Messenger RNA Synthesis         | Reactome     |
| 8.56E-05   | 0.000718   | Glycosphingolipid metabolism          | EHMN         |
| 9.28E-05   | 0.00076442 | Glycolysis                            | Reactome     |
| 9.45E-05   | 0.00076476 | za Viral RNA Transcription and Rep    | Reactome     |
| 0.00011038 | 0.0008772  | h <i>O</i>-[<i>N</i>-acetyl]-glucos   | HumanCyc     |
| 0.00011733 | 0.00090086 | Fanconi anemia pathway                | PID          |
| 0.00011733 | 0.00090086 | MOylation of RNA binding proteir      | Reactome     |
| 0.00012599 | 0.00093566 | erpathway of cholesterol biosynth     | HumanCyc     |
| 0.00012599 | 0.00093566 | Cholesterol biosynthesis              | Reactome     |
| 0.00013167 | 0.00096206 | Membrane Trafficking                  | Reactome     |
| 0.00013722 | 0.00098664 | Metabolism of RNA                     | Reactome     |
| 0.00016971 | 0.00119845 | serine, alanine and threonine met     | EHMN         |
| 0.00017196 | 0.00119845 | amin D3 (cholecalciferol) metaboli    | EHMN         |
| 0.00019276 | 0.00132306 | Nuclear Envelope Breakdown            | Reactome     |
| 0.00021148 | 0.00140883 | snRNP Assembly                        | Reactome     |
| 0.00021148 | 0.00140883 | Metabolism of non-coding RNA          | Reactome     |
| 0.00022895 | 0.00149845 | Pentose phosphate pathway             | EHMN         |
| 0.00023155 | 0.00149845 | Influenza Life Cycle                  | Reactome     |
| 0.00025304 | 0.00161444 | anemia pathway - Homo sapiens (       | KEGG         |
| 0.00027862 | 0.00175298 | Vesicle-mediated transport            | Reactome     |
| 0.0002984  | 0.00180234 | sulfuration and one carbon metab      | Wikipathways |
| 0.0002984  | 0.00180234 | B5 - CoA biosynthesis from pantof     | EHMN         |
| 0.0002984  | 0.00180234 | din formation from dihomogama-l       | EHMN         |
| 0.00033201 | 0.00197898 | RHO GTPase Effectors                  | Reactome     |
| 0.00034931 | 0.00205504 | Host Interactions of HIV factors      | Reactome     |
| 0.00037106 | 0.00215501 | Glucose metabolism                    | Reactome     |
| 0.0003834  | 0.00219847 | role in mitosis and chromosome dy     | BioCarta     |
| 0.00047556 | 0.00269284 | Cholesterol Biosynthesis Pathway      | Wikipathways |
| 0.00052135 | 0.00291568 | Influenza Infection                   | Reactome     |
| 0.00061816 | 0.00341494 | Cellular response to heat stress      | Reactome     |
| 0.00064636 | 0.00352774 | Glycolysis and Gluconeogenesis        | EHMN         |
| 0.00074136 | 0.00399804 | tory Element-Binding Proteins (SRE    | Wikipathways |
| 0.00078801 | 0.00419964 | Golgi and retrograde Golgi-to-ER t    | Reactome     |
| 0.00084642 | 0.00445847 | ylation of chromatin organization p   | Reactome     |

|            |            |                                     |              |
|------------|------------|-------------------------------------|--------------|
| 0.00097049 | 0.00505325 | Inflammatory metabolites formati    | EHMN         |
| 0.00102432 | 0.00514183 | e mRNA derived from an Intron-Co    | Reactome     |
| 0.00106136 | 0.00514183 | De novo fatty acid biosynthesis     | EHMN         |
| 0.00106136 | 0.00514183 | Vitamin E metabolism                | EHMN         |
| 0.00114641 | 0.00514183 | Phosphorylation of the APC/C        | Reactome     |
| 0.00114641 | 0.00514183 | om APC/C:Cdc20 to APC/C:Cdh1 in     | Reactome     |
| 0.00114641 | 0.00514183 | tion of gene expression by SREBF (S | Wikipathways |
| 0.00114641 | 0.00514183 | ylhomocysteine (SAH) Hydrolase D    | SMPDB        |
| 0.00114641 | 0.00514183 | Methionine Metabolism               | SMPDB        |
| 0.00114641 | 0.00514183 | hionine Adenosyltransferase Defici  | SMPDB        |
| 0.00114641 | 0.00514183 | ycine N-methyltransferase Deficien  | SMPDB        |
| 0.00114641 | 0.00514183 | Hypermethioninemia                  | SMPDB        |
| 0.00114641 | 0.00514183 | trahydrofolate Reductase Deficien   | SMPDB        |
| 0.00114641 | 0.00514183 | ia due to defect in cobalamin meta  | SMPDB        |
| 0.00114641 | 0.00514183 | stathionine Beta-Synthase Deficien  | SMPDB        |
| 0.00121927 | 0.00535519 | HIV Life Cycle                      | Reactome     |
| 0.00122858 | 0.00535519 | n of DNA damage response and rep    | Reactome     |
| 0.00148493 | 0.00535519 | 3 (nicotinate and nicotinamide) me  | EHMN         |
| 0.00152499 | 0.00535519 | hidine deoxyribonucleotides <i>de   | HumanCyc     |
| 0.00152499 | 0.00535519 | Pravastatin Action Pathway          | SMPDB        |
| 0.00152499 | 0.00535519 | Atorvastatin Action Pathway         | SMPDB        |
| 0.00152499 | 0.00535519 | Rosuvastatin Action Pathway         | SMPDB        |
| 0.00152499 | 0.00535519 | Lovastatin Action Pathway           | SMPDB        |
| 0.00152499 | 0.00535519 | Cerivastatin Action Pathway         | SMPDB        |
| 0.00152499 | 0.00535519 | Fluvastatin Action Pathway          | SMPDB        |
| 0.00152499 | 0.00535519 | Simvastatin Action Pathway          | SMPDB        |
| 0.00152499 | 0.00535519 | Hyper-IgD syndrome                  | SMPDB        |
| 0.00152499 | 0.00535519 | Cholesteryl ester storage disease   | SMPDB        |
| 0.00152499 | 0.00535519 | al Acid Lipase Deficiency (Wolman   | SMPDB        |
| 0.00152499 | 0.00535519 | Mevalonic aciduria                  | SMPDB        |
| 0.00152499 | 0.00535519 | Wolman disease                      | SMPDB        |
| 0.00152499 | 0.00535519 | Smith-Lemli-Opitz Syndrome (SLOS    | SMPDB        |
| 0.00152499 | 0.00535519 | splasia Punctata II, X Linked Domin | SMPDB        |
| 0.00152499 | 0.00535519 | CHILD Syndrome                      | SMPDB        |
| 0.00152499 | 0.00535519 | Desmosterolosis                     | SMPDB        |
| 0.00152499 | 0.00535519 | Hypercholesterolemia                | SMPDB        |
| 0.00152499 | 0.00535519 | Steroid Biosynthesis                | SMPDB        |
| 0.00152499 | 0.00535519 | Alendronate Action Pathway          | SMPDB        |
| 0.00152499 | 0.00535519 | Risedronate Action Pathway          | SMPDB        |
| 0.00152499 | 0.00535519 | Pamidronate Action Pathway          | SMPDB        |
| 0.00152499 | 0.00535519 | Zoledronate Action Pathway          | SMPDB        |
| 0.00152499 | 0.00535519 | Ibandronate Action Pathway          | SMPDB        |
| 0.00152499 | 0.00535519 | odegradation of Cdh1 by Cdh1:AP     | Reactome     |
| 0.00161029 | 0.0055684  | zymosterol biosynthesis             | HumanCyc     |



|            |            |                                      |              |
|------------|------------|--------------------------------------|--------------|
| 0.00161029 | 0.0055684  | methionine degradation               | HumanCyc     |
| 0.0016339  | 0.00560725 | ion of HSF1-mediated heat shock r    | Reactome     |
| 0.00172548 | 0.00587702 | port of Mature Transcript to Cytop   | Reactome     |
| 0.00174029 | 0.00588321 | :Cdc20 mediated degradation of S     | Reactome     |
| 0.0019335  | 0.00648796 | DNA Repair                           | Reactome     |
| 0.00197366 | 0.00657402 | :Cdc20 mediated degradation of C     | Reactome     |
| 0.00198881 | 0.00657615 | Cell cycle - Homo sapiens (human)    | KEGG         |
| 0.00222561 | 0.00719937 | Methionine Cysteine metabolism       | INOH         |
| 0.00223883 | 0.00719937 | Mevalonate pathway                   | Wikipathways |
| 0.00223883 | 0.00719937 | ulatory component of the Drosha n    | Wikipathways |
| 0.00224086 | 0.00719937 | targets of C-MYC transcriptional a   | PID          |
| 0.00242755 | 0.00774424 | Purine metabolism                    | EHMN         |
| 0.00247551 | 0.007842   | Retinoblastoma Gene in Cancer        | Wikipathways |
| 0.00249664 | 0.00785403 | tion of gene expression by SREBF (S  | Reactome     |
| 0.00260637 | 0.00814265 | Metabolism of proteins               | Reactome     |
| 0.00278723 | 0.00864805 | F Cdc20 and other APC/C:Cdh1 targ    | Reactome     |
| 0.00304574 | 0.00938586 | Pyrimidine metabolism                | EHMN         |
| 0.00309782 | 0.0094182  | One Carbon Metabolism                | Wikipathways |
| 0.00309782 | 0.0094182  | iated phosphorylation and remova     | Reactome     |
| 0.00315926 | 0.00954097 | Glycerophospholipid metabolism       | EHMN         |
| 0.00327591 | 0.00982773 | mediated proteolysis - Homo sapier   | KEGG         |
| 0.00365369 | 0.01088897 | Lysine metabolism                    | EHMN         |
| 0.00376416 | 0.01106269 | Cellular Senescence                  | Reactome     |
| 0.00377488 | 0.01106269 | Late Phase of HIV Life Cycle         | Reactome     |
| 0.00378525 | 0.01106269 | cysteine biosynthesis                | HumanCyc     |
| 0.00415381 | 0.01206204 | of cholesterol biosynthesis by SRE   | Reactome     |
| 0.00459543 | 0.01325942 | HIV Infection                        | Reactome     |
| 0.00464496 | 0.01331751 | S Phase                              | Reactome     |
| 0.00469897 | 0.01338762 | mevalonate pathway                   | HumanCyc     |
| 0.00510751 | 0.01446064 | Infectious disease                   | Reactome     |
| 0.00524441 | 0.01475601 | nscriptional regulation by small RN  | Reactome     |
| 0.00540417 | 0.01511166 | version of nucleotide di- and tripho | Reactome     |
| 0.00572011 | 0.01589699 | ctivated Protein Kinase (AMPK) Sig   | Wikipathways |
| 0.00579512 | 0.01600726 | Signaling by Rho GTPases             | Reactome     |
| 0.00590312 | 0.01620674 | Transcriptional Regulation by TP53   | Reactome     |
| 0.00635025 | 0.01732929 | target Of Rapamycin (TOR) Signalin   | Wikipathways |
| 0.00679732 | 0.01832848 | anylgeranyldiphosphate biosynthe     | HumanCyc     |
| 0.00679732 | 0.01832848 | Selenoamino Acid Metabolism          | SMPDB        |
| 0.00738909 | 0.01980625 | tRNA charging                        | HumanCyc     |
| 0.007978   | 0.02065161 | cholesterol biosynthesis I           | HumanCyc     |
| 0.007978   | 0.02065161 | l biosynthesis II (via 24,25-dihydro | HumanCyc     |
| 0.007978   | 0.02065161 | sterol biosynthesis III (via desmost | HumanCyc     |
| 0.007978   | 0.02065161 | Gemcitabine Action Pathway           | SMPDB        |
| 0.007978   | 0.02065161 | Gemcitabine Metabolism Pathway       | SMPDB        |

|            |            |                                      |             |
|------------|------------|--------------------------------------|-------------|
| 0.007978   | 0.02065161 | ite Pathway - Folate Cycle, Pharma   | PharmGKB    |
| 0.00852269 | 0.02168991 | leukemia virus 1 infection - Homo sa | KEGG        |
| 0.00852275 | 0.02168991 | mTOR signalling                      | Reactome    |
| 0.00852275 | 0.02168991 | Fanconi Anemia Pathway               | Reactome    |
| 0.00870597 | 0.02196382 | EGFR1                                | NetPath     |
| 0.00872735 | 0.02196382 | Ub-specific processing proteases     | Reactome    |
| 0.00877851 | 0.02197053 | O E3 ligases SUMOylate target pro    | Reactome    |
| 0.00924376 | 0.02266264 | Mitotic Telophase/Cytokinesis        | Reactome    |
| 0.00924376 | 0.02266264 | regulates Transcription of DNA Repa  | Wikipathway |
| 0.00924381 | 0.02266264 | insulin                              | INOH        |
| 0.00925516 | 0.02266264 | ost-translational protein modificati | Reactome    |
| 0.00948768 | 0.02310709 | IA transport - Homo sapiens (huma    | KEGG        |
| 0.00975303 | 0.02362633 | tRNA Aminoacylation                  | Reactome    |

data Pathway enrichment analysis on the overlap between down-regulated gene

| external_id                        | members_input_overlap                     |
|------------------------------------|-------------------------------------------|
| R-HSA-68886                        | TC1; SMC4; NUP160; NUP93; NCAPD2; NUP85   |
| R-HSA-1640170                      | TC1; SMC4; NBN; NUP160; NUP93; NCAPD2; NC |
| R-HSA-69278                        | TC1; SMC4; NUP160; NUP93; NCAPD2; NCAPD3; |
| R-HSA-68877                        | A; NUP160; SMC2; KNTC1; NUP85; NCAPD2; SM |
| R-HSA-2467813                      | ; BUB1B; CDC27; PDS5A; NUP160; KNTC1; NUP |
| R-HSA-68882                        | ; BUB1B; CDC27; PDS5A; NUP160; KNTC1; NUP |
| R-HSA-69618                        | C16; BUB1B; CDC27; NUP160; KNTC1; NUP85;  |
| R-HSA-2555396                      | ; BUB1B; CDC27; PDS5A; NUP160; KNTC1; NUP |
| R-HSA-2514853                      | NCAPG; SMC2; SMC4; NCAPD2; NCAPH          |
| aurora_b_pathway                   | N2; SMC2; SMC4; NCAPD2; NCAPH; NCAPG; KI  |
| R-HSA-180910                       | AAAS; PSIP1; NUP54; NUP160; NUP93; NUP85  |
| Aminosugars metabolism             | A; NUP54; NUP160; NUP93; NUP85; MGEA5; C  |
| R-HSA-176033                       | AAAS; PSIP1; NUP54; NUP160; NUP93; NUP85  |
| Methionine and cysteine metabolism | AT2A; NUP54; NUP160; DNMT1; NUP93; NUP8   |
| Selenoamino acid metabolism        | HCYL1; NUP54; NUP160; NUP93; NUP85; MAT2  |
| R-HSA-141430                       | CDC27; MAD2L1; CDC16; ANAPC7; BUB1B       |
| R-HSA-141405                       | CDC27; MAD2L1; CDC16; ANAPC7; BUB1B       |
| R-HSA-2500257                      | D2L1; BUB1B; PDS5A; NUP160; KNTC1; NUP85  |
| R-HSA-69620                        | UB1B; CDC27; NUP160; KNTC1; NUP85; NBN;   |
| R-HSA-6811434                      | KIF2A; COPB2; ARFGAP2; ZW10; KIF20A; NBAS |
| R-HSA-179409                       | CDC27; MAD2L1; CDC16; ANAPC7; BUB1B       |
| R-HSA-141444                       | MAD2L1; BUB1B; NUP160; KNTC1; NUP85; ZW   |
| R-HSA-141424                       | MAD2L1; BUB1B; NUP160; KNTC1; NUP85; ZW   |
| R-HSA-174184                       | CDC27; MAD2L1; CDC16; ANAPC7; BUB1B       |
| R-HSA-179419                       | CDC27; MAD2L1; CDC16; ANAPC7; BUB1B       |
| R-HSA-72306                        | UP54; NUP160; NSUN2; NUP93; NUP85; DDX1   |
| R-HSA-168271                       | NUP160; AAAS; NUP93; NUP85; NUP54         |
| R-HSA-170822                       | NUP160; AAAS; NUP93; NUP85; NUP54         |
| R-HSA-168333                       | NUP160; AAAS; NUP93; NUP85; NUP54         |
| R-HSA-176409                       | CDC27; MAD2L1; CDC16; ANAPC7; BUB1B       |
| R-HSA-168274                       | NUP160; AAAS; NUP93; NUP85; NUP54         |
| R-HSA-176814                       | CDC27; MAD2L1; CDC16; ANAPC7; BUB1B       |
| R-HSA-68875                        | P54; NUP160; SMC2; NUP93; NUP85; SMC4; A  |
| R-HSA-159227                       | NUP160; AAAS; NUP93; NUP85; NUP54         |
| R-HSA-165054                       | NUP160; AAAS; NUP93; NUP85; NUP54         |
| R-HSA-180746                       | NUP160; AAAS; NUP93; NUP85; NUP54         |
| R-HSA-159230                       | NUP160; AAAS; NUP93; NUP85; NUP54         |
| R-HSA-3301854                      | NUP160; AAAS; NUP93; NUP85; NUP54         |
| R-HSA-6784531                      | AAAS; NUP54; NUP160; NUP93; NUP85; DDX1   |
| R-HSA-8953897                      | AG1; NUP160; NUP93; NUP85; CDC27; EZH2; E |
| R-HSA-8856688                      | NBAS; COPB2; ARFGAP2; ZW10; KIFC1; KIF2A; |
| R-HSA-176408                       | CDC27; MAD2L1; CDC16; ANAPC7; BUB1B       |

|                                    |                                            |
|------------------------------------|--------------------------------------------|
| ualene and cholesterol biosynthe   | NUP160; NUP93; NUP85; HMGCR; NUP54         |
| R-HSA-4615885                      | NUP160; AAAS; NUP93; NUP85; NUP54          |
| R-HSA-177243                       | NUP160; AAAS; NUP93; NUP85; NUP54          |
| R-HSA-5663220                      | MAD2L1; BUB1B; NUP160; KNTC1; NUP85; ZW    |
| phatidylinositol phosphate metab   | C3; NUP54; NUP160; NUP93; NUP85; COPA; CO  |
| R-HSA-159231                       | NUP160; AAAS; NUP93; NUP85; NUP54          |
| R-HSA-174143                       | CDC27; MAD2L1; CDC16; ANAPC7; BUB1B        |
| R-HSA-453276                       | CDC27; MAD2L1; CDC16; ANAPC7; BUB1B        |
| R-HSA-159234                       | NUP160; AAAS; NUP93; NUP85; NUP54          |
| R-HSA-2262752                      | P54; CDC27; NUP160; NUP93; NUP85; EZH2; EF |
| R-HSA-168325                       | NUP160; AAAS; NUP93; NUP85; NUP54          |
| Glycosphingolipid metabolism       | COPA; NUP54; NUP160; NUP93; NUP85; COPB2   |
| R-HSA-70171                        | PP2R1B; NUP54; NUP160; NUP93; AAAS; NUP8   |
| R-HSA-168273                       | NUP160; AAAS; NUP93; NUP85; NUP54          |
| PWY-7437                           | OGT; MGEA5                                 |
| fanconi_pathway                    | WDR48; USP1; NBN; FANCI; BRIP1             |
| R-HSA-4570464                      | NUP160; AAAS; NUP93; NUP85; NUP54          |
| PWY66-5                            | HMGCS1; LBR; HMGCR; CYP51A1                |
| R-HSA-191273                       | HMGCS1; LBR; HMGCR; CYP51A1                |
| R-HSA-199991                       | ; COPB2; ARFGAP2; SNF8; COPS7A; TRAPPC12;  |
| R-HSA-8953854                      | R1; NUP93; DIMT1; NUP85; NUP160; DDX5; DI  |
| serine, alanine and threonine met  | ARS2; NUP54; NUP160; NUP93; NUP85; AARS;   |
| amin D3 (cholecalciferol) metaboli | NUP160; NUP93; NUP85; NUP54                |
| R-HSA-2980766                      | NUP160; AAAS; NUP93; NUP85; NUP54          |
| R-HSA-191859                       | NUP160; AAAS; NUP93; NUP85; NUP54          |
| R-HSA-194441                       | NUP160; AAAS; NUP93; NUP85; NUP54          |
| Pentose phosphate pathway          | NUP160; NUP93; NUP85; NUP54                |
| R-HSA-168255                       | NUP160; AAAS; NUP93; NUP85; NUP54          |
| path:hsa03460                      | WDR48; BRIP1; MLH1; FANCI; USP1            |
| R-HSA-5653656                      | ; COPB2; ARFGAP2; SNF8; COPS7A; TRAPPC12;  |
| WP2525                             | TYMS; DNMT1; AHCYL1; MAT2A                 |
| B5 - CoA biosynthesis from panto   | NUP160; NUP93; NUP85; NUP54                |
| lin formation from dihomogama-     | NUP160; NUP93; NUP85; NUP54                |
| R-HSA-195258                       | BUB1B; NUP160; KNTC1; NUP85; PTK2; CIT; Z  |
| R-HSA-162909                       | AAAS; PSIP1; NUP54; NUP160; NUP93; NUP85   |
| R-HSA-70326                        | PP2R1B; NUP54; NUP160; NUP93; AAAS; NUP8   |
| akap95pathway                      | PRKAG1; DDX5; NCAPD2                       |
| WP197                              | HMGCS1; HMGCR; CYP51A1                     |
| R-HSA-168254                       | NUP160; AAAS; NUP93; NUP85; NUP54          |
| R-HSA-3371556                      | RPTOR; AAAS; NUP54; NUP160; NUP93; NUP85   |
| Glycolysis and Gluconeogenesis     | NUP160; ME2; NUP93; NUP85; NUP54           |
| WP1982                             | PRKAG1; HMGCS1; ACLY; HMGCR; CYP51A1       |
| R-HSA-6811442                      | NBAS; COPB2; ARFGAP2; ZW10; KIFC1; KIF2A;  |
| R-HSA-4551638                      | NUP160; AAAS; NUP93; NUP85; NUP54          |

|                                   |                                                                            |
|-----------------------------------|----------------------------------------------------------------------------|
| Inflammatory metabolites format   | NUP160; NUP93; NUP85; NUP54                                                |
| R-HSA-159236                      | NUP160; AAAS; NUP93; NUP85; NUP54                                          |
| De novo fatty acid biosynthesis   | NUP160; NUP93; NUP85; NUP54                                                |
| Vitamin E metabolism              | NUP160; NUP93; NUP85; NUP54                                                |
| R-HSA-176412                      | CDC27; CDC16; ANAPC7                                                       |
| R-HSA-176407                      | CDC27; CDC16; ANAPC7                                                       |
| WP2706                            | HMGCS1; HMGCR; CYP51A1                                                     |
| SMP00214                          | DNMT1; MAT2A; MARS                                                         |
| SMP00033                          | DNMT1; MAT2A; MARS                                                         |
| SMP00221                          | DNMT1; MAT2A; MARS                                                         |
| SMP00222                          | DNMT1; MAT2A; MARS                                                         |
| SMP00341                          | DNMT1; MAT2A; MARS                                                         |
| SMP00340                          | DNMT1; MAT2A; MARS                                                         |
| SMP00570                          | DNMT1; MAT2A; MARS                                                         |
| SMP00177                          | DNMT1; MAT2A; MARS                                                         |
| R-HSA-162587                      | 5; PSIP1; NUP54; NUP160; NUP93; PDCD6IP; NUP160; AAAS; NUP93; NUP85; NUP54 |
| R-HSA-3108214                     | NUP160; AAAS; NUP93; NUP85; NUP54                                          |
| 3 (nicotinate and nicotinamide) m | NUP160; NUP93; NUP85; NUP54                                                |
| PWY-7211                          | TYMS; DTYMK; CTPS1                                                         |
| SMP00089                          | HMGCS1; HMGCR; CYP51A1                                                     |
| SMP00131                          | HMGCS1; HMGCR; CYP51A1                                                     |
| SMP00092                          | HMGCS1; HMGCR; CYP51A1                                                     |
| SMP00099                          | HMGCS1; HMGCR; CYP51A1                                                     |
| SMP00111                          | HMGCS1; HMGCR; CYP51A1                                                     |
| SMP00119                          | HMGCS1; HMGCR; CYP51A1                                                     |
| SMP00082                          | HMGCS1; HMGCR; CYP51A1                                                     |
| SMP00509                          | HMGCS1; HMGCR; CYP51A1                                                     |
| SMP00508                          | HMGCS1; HMGCR; CYP51A1                                                     |
| SMP00319                          | HMGCS1; HMGCR; CYP51A1                                                     |
| SMP00510                          | HMGCS1; HMGCR; CYP51A1                                                     |
| SMP00511                          | HMGCS1; HMGCR; CYP51A1                                                     |
| SMP00389                          | HMGCS1; HMGCR; CYP51A1                                                     |
| SMP00388                          | HMGCS1; HMGCR; CYP51A1                                                     |
| SMP00387                          | HMGCS1; HMGCR; CYP51A1                                                     |
| SMP00386                          | HMGCS1; HMGCR; CYP51A1                                                     |
| SMP00209                          | HMGCS1; HMGCR; CYP51A1                                                     |
| SMP00023                          | HMGCS1; HMGCR; CYP51A1                                                     |
| SMP00095                          | HMGCS1; HMGCR; CYP51A1                                                     |
| SMP00112                          | HMGCS1; HMGCR; CYP51A1                                                     |
| SMP00117                          | HMGCS1; HMGCR; CYP51A1                                                     |
| SMP00107                          | HMGCS1; HMGCR; CYP51A1                                                     |
| SMP00079                          | HMGCS1; HMGCR; CYP51A1                                                     |
| R-HSA-174084                      | CDC27; CDC16; ANAPC7                                                       |
| PWY-6074                          | LBR; CYP51A1                                                               |

|                                |                                            |
|--------------------------------|--------------------------------------------|
| METHIONINE-DEG1-PWY            | MAT2A; AHCYL1                              |
| R-HSA-3371453                  | NUP160; AAAS; NUP93; NUP85; NUP54          |
| R-HSA-72202                    | NUP160; AAAS; NUP93; NUP85; NUP54          |
| R-HSA-174154                   | CDC27; CDC16; ANAPC7                       |
| R-HSA-73894                    | WDR48; USP1; MLH1; USP7; NBN; BRIP1; FAN   |
| R-HSA-174048                   | CDC27; CDC16; ANAPC7                       |
| path:hsa04110                  | MAD2L1; CDC16; BUB1B; CDC27; CDK4; ANAPC   |
| None                           | MAT2A; AHCYL1; MARS                        |
| WP3963                         | HMGCS1; HMGCR                              |
| WP2942                         | NBN; DDX1                                  |
| <b>myc_activpathway</b>        | <b>EIF4G1; HUWE1; CDK4; NBN; TRRAP</b>     |
| Purine metabolism              | P54; NUP160; NUP93; NUP85; ATP6V0A1; COP   |
| WP2446                         | SMC2; HLTf; DNMT1; CDK4; TYMS              |
| R-HSA-2426168                  | HMGCS1; HMGCR; CYP51A1                     |
| R-HSA-392499                   | NUP160; COPA; PSME4; NUP93; TRRAP; PIGS;   |
| R-HSA-174178                   | CDC27; CDC16; ANAPC7                       |
| Pyrimidine metabolism          | COPA; NUP54; NUP160; NUP93; NUP85; COPB2   |
| WP241                          | TYMS; GART; DNMT1                          |
| R-HSA-69017                    | CDC27; CDC16; ANAPC7                       |
| Glycerophospholipid metabolism | COPA; NUP54; NUP160; NUP93; NUP85; COPB2   |
| path:hsa04120                  | JBE3A; CDC16; CDC27; BIRC6; HUWE1; ANAPC   |
| Lysine metabolism              | NUP160; NUP93; NUP85; NUP54                |
| R-HSA-2559583                  | DC16; CDC27; EZH2; EP400; NBN; CDK4; ANAPC |
| R-HSA-162599                   | AAAS; NUP54; NUP160; NUP93; PDCD6IP; NUP8  |
| PWY-6292                       | MAT2A; AHCYL1                              |
| R-HSA-1655829                  | HMGCS1; HMGCR; CYP51A1                     |
| R-HSA-162906                   | S; PSIP1; NUP54; NUP160; NUP93; PDCD6IP; N |
| R-HSA-69242                    | CDC27; CDK4; PDS5A; CDC16; ANAPC7          |
| PWY-922                        | HMGCS1; HMGCR                              |
| R-HSA-5663205                  | P1; NUP54; NUP160; NUP93; PDCD6IP; NUP85   |
| R-HSA-5578749                  | NUP160; AAAS; NUP93; NUP85; NUP54          |
| R-HSA-499943                   | TYMS; DTYMK; CTPS1                         |
| WP1403                         | RPTOR; PRKAG1; PIK3C3; HMGCR               |
| R-HSA-194315                   | BUB1B; NUP160; KNTC1; NUP85; PTK2; CIT; Z  |
| R-HSA-3700989                  | 3; PRKAG1; MLH1; USP7; RABGGTB; NBN; CNO   |
| WP1471                         | RPTOR; PRKAG1; HMGCR                       |
| PWY-5910                       | HMGCS1; HMGCR                              |
| SMP00029                       | MAT2A; MARS                                |
| TRNA-CHARGING-PWY              | AARS2; TARS2; MARS                         |
| PWY66-341                      | LBR; CYP51A1                               |
| PWY66-3                        | LBR; CYP51A1                               |
| PWY66-4                        | LBR; CYP51A1                               |
| SMP00446                       | TYMS; CTPS1                                |
| SMP00603                       | TYMS; CTPS1                                |

|               |                                            |
|---------------|--------------------------------------------|
| PA165291575   | TYMS; GART                                 |
| path:hsa05166 | 2L1; CDC16; BUB1B; CDC27; TRRAP; CDK4; AN  |
| R-HSA-165159  | RPTOR; PRKAG1; EIF4G1                      |
| R-HSA-6783310 | WDR48; USP1; FANCI                         |
| Pathway_EGFR1 | EIF4G1; HUWE1; ZFYVE16; PDCD6IP; FLOT1; TO |
| R-HSA-5689880 | 19; WDR48; PSME4; PSMD13; USP7; TRRAP; US  |
| R-HSA-3108232 | NUP160; AAAS; NUP93; NUP85; NUP54          |
| R-HSA-68884   | PDS5A; KIF20A                              |
| WP3808        | MLH1; FANCI                                |
| None          | RPTOR; PRKAG1; EIF4G1; PPP2R1B             |
| R-HSA-597592  | NUP160; COPA; PSME4; NUP93; TRRAP; PIGS;   |
| path:hsa03013 | AAAS; NUP54; EIF4G1; NUP93; NUP85; NUP160  |
| R-HSA-379724  | AARS2; TARS2; MARS                         |

| members_input_overlap_geneids                                                 | size |
|-------------------------------------------------------------------------------|------|
| ; 53371; 23397; 10051; 10112; 9688; 9735; 9183; 8881; 23310; 23244; 3796; 99  | 340  |
| ; 10592; 8086; 51434; 53371; 996; 4683; 1019; 9918; 64151; 3796; 23397; 1011  | 564  |
| 81; 23310; 701; 10592; 8086; 51434; 53371; 996; 3796; 1019; 9918; 64151; 2339 | 481  |
| 64151; 3796; 4085; 79902; 23397; 9735; 9183; 10051; 23244; 23279; 9918; 701;  | 186  |
| 5519; 3796; 4085; 79902; 9735; 51434; 9183; 8881; 23244; 996; 23279; 701      | 129  |
| 5519; 3796; 4085; 79902; 9735; 51434; 9183; 8881; 23244; 996; 23279; 701      | 140  |
| 5519; 3796; 4085; 79902; 9735; 51434; 996; 9183; 8881; 23279; 701             | 113  |
| 5519; 3796; 4085; 79902; 9735; 51434; 9183; 8881; 23244; 996; 23279; 701      | 141  |
| 10051; 10592; 9918; 23397; 64151                                              | 12   |
| 10112; 9918; 10051; 23397; 64151; 10592; 54888                                | 41   |
| 9688; 79902; 11168; 23279; 53371; 8086                                        | 32   |
| 9688; 79902; 23279; 53371; 1314; 10724; 9276                                  | 51   |
| 9688; 79902; 11168; 23279; 53371; 8086                                        | 35   |
| 9688; 79902; 23279; 1314; 53371; 4144; 1786; 9276                             | 78   |
| 9688; 79902; 23279; 10768; 53371; 4144                                        | 36   |
| 4085; 996; 51434; 8881; 701                                                   | 21   |
| 4085; 996; 51434; 8881; 701                                                   | 21   |
| 9735; 5519; 3796; 4085; 79902; 9183; 23244; 23279; 701                        | 109  |
| 519; 3796; 79902; 9735; 51434; 996; 4085; 9183; 8881; 83990; 4683; 701; 2327  | 250  |
| 3796; 10112; 51594; 3833; 84364; 9183; 1314; 9276                             | 82   |
| 4085; 701; 51434; 8881; 996                                                   | 26   |
| 5519; 3796; 4085; 79902; 9735; 9183; 23279; 701                               | 96   |
| 5519; 3796; 4085; 79902; 9735; 9183; 23279; 701                               | 96   |
| 4085; 51434; 8881; 701; 996                                                   | 28   |
| 4085; 51434; 8881; 701; 996                                                   | 29   |
| 1653; 79902; 63892; 53371; 9688; 23279; 8086; 54888                           | 103  |
| 9688; 79902; 23279; 53371; 8086                                               | 30   |
| 9688; 79902; 23279; 53371; 8086                                               | 30   |
| 9688; 79902; 53371; 23279; 8086                                               | 30   |
| 4085; 51434; 8881; 701; 996                                                   | 31   |
| 9688; 79902; 53371; 23279; 8086                                               | 31   |
| 4085; 51434; 8881; 701; 996                                                   | 32   |
| 5519; 23310; 79902; 53371; 9688; 10051; 23279; 10592; 8086                    | 144  |
| 9688; 79902; 23279; 53371; 8086                                               | 33   |
| 9688; 79902; 53371; 23279; 8086                                               | 33   |
| 9688; 79902; 23279; 53371; 8086                                               | 34   |
| 9688; 79902; 23279; 53371; 8086                                               | 34   |
| 9688; 79902; 23279; 53371; 8086                                               | 34   |
| 1653; 9688; 79902; 23279; 53371; 8086                                         | 57   |
| 71; 79902; 8881; 8086; 57634; 51434; 53371; 996; 4683; 1019; 9688; 23279; 214 | 414  |
| 1314; 3796; 9276; 10112; 3833; 9183; 51594; 84364                             | 116  |
| 4085; 996; 51434; 8881; 701                                                   | 36   |



|                                                                               |     |
|-------------------------------------------------------------------------------|-----|
| 3156; 9688; 23279; 53371; 79902                                               | 37  |
| 9688; 79902; 23279; 53371; 8086                                               | 37  |
| 9688; 79902; 53371; 23279; 8086                                               | 37  |
| 5519; 3796; 4085; 79902; 9735; 9183; 23279; 701                               | 123 |
| 5289; 1314; 79902; 53371; 9276; 9688; 23279                                   | 93  |
| 9688; 79902; 23279; 53371; 8086                                               | 40  |
| 4085; 996; 51434; 8881; 701                                                   | 41  |
| 4085; 996; 51434; 8881; 701                                                   | 41  |
| 9688; 79902; 23279; 53371; 8086                                               | 41  |
| 902; 8881; 8086; 57634; 51434; 53371; 996; 4683; 1019; 2146; 9688; 23279; 579 | 345 |
| 9688; 79902; 23279; 53371; 8086                                               | 42  |
| 79902; 9688; 23279; 53371; 1314; 9276                                         | 69  |
| 79902; 9688; 5519; 23279; 53371; 8086                                         | 71  |
| 9688; 79902; 23279; 53371; 8086                                               | 44  |
| 10724; 8473                                                                   | 2   |
| 7398; 57599; 55215; 4683; 83990                                               | 46  |
| 9688; 79902; 53371; 23279; 8086                                               | 46  |
| 3156; 1595; 3930; 3157                                                        | 25  |
| 3156; 1595; 3930; 3157                                                        | 25  |
| ; 27131; 51622; 221960; 51594; 51112; 3796; 10112; 9183; 1314; 50813; 9276;   | 582 |
| 6; 53371; 27292; 1981; 1655; 1653; 55127; 3842; 9688; 23279; 54888; 11325; 5  | 586 |
| 57505; 9688; 79902; 53371; 80222; 23279                                       | 78  |
| 9688; 79902; 23279; 53371                                                     | 27  |
| 9688; 79902; 53371; 23279; 8086                                               | 51  |
| 9688; 79902; 23279; 53371; 8086                                               | 52  |
| 9688; 79902; 23279; 53371; 8086                                               | 52  |
| 9688; 79902; 23279; 53371                                                     | 29  |
| 9688; 79902; 23279; 53371; 8086                                               | 53  |
| 83990; 55215; 4292; 7398; 57599                                               | 54  |
| ; 27131; 51622; 221960; 51594; 51112; 3796; 10112; 50813; 9183; 1314; 9276;   | 620 |
| 1786; 10768; 7298; 4144                                                       | 31  |
| 9688; 79902; 23279; 53371                                                     | 31  |
| 9688; 79902; 23279; 53371                                                     | 31  |
| 5519; 11113; 3796; 4085; 79902; 9735; 5289; 9183; 5747; 701; 23279            | 301 |
| 79902; 11168; 53371; 9688; 23279; 8086                                        | 89  |
| 5519; 79902; 53371; 9688; 23279; 8086                                         | 91  |
| 5571; 9918; 1655                                                              | 14  |
| 1595; 3157; 3156                                                              | 15  |
| 9688; 79902; 23279; 53371; 8086                                               | 63  |
| 79902; 53371; 9688; 57521; 23279; 8086                                        | 99  |
| 9688; 79902; 23279; 53371; 4200                                               | 67  |
| 3157; 1595; 47; 3156; 5571                                                    | 68  |
| 1314; 3796; 9276; 10112; 3833; 9183; 51594; 84364                             | 186 |
| 9688; 79902; 23279; 53371; 8086                                               | 70  |

|                                               |     |
|-----------------------------------------------|-----|
| 9688; 79902; 23279; 53371                     | 42  |
| 9688; 79902; 23279; 53371; 8086               | 73  |
| 9688; 79902; 53371; 23279                     | 43  |
| 79902; 9688; 23279; 53371                     | 43  |
| 996; 51434; 8881                              | 20  |
| 996; 51434; 8881                              | 20  |
| 1595; 3156; 3157                              | 20  |
| 1786; 4141; 4144                              | 20  |
| 1786; 4141; 4144                              | 20  |
| 1786; 4141; 4144                              | 20  |
| 1786; 4141; 4144                              | 20  |
| 1786; 4141; 4144                              | 20  |
| 1786; 4141; 4144                              | 20  |
| 1786; 4141; 4144                              | 20  |
| 1786; 4141; 4144                              | 20  |
| 79902; 53371; 9688; 23279; 10015; 11168; 8086 | 156 |
| 9688; 23279; 53371; 79902; 8086               | 76  |
| 9688; 79902; 23279; 53371                     | 47  |
| 1503; 1841; 7298                              | 22  |
| 3156; 3157; 1595                              | 22  |
| 3156; 3157; 1595                              | 22  |
| 3156; 3157; 1595                              | 22  |
| 3156; 3157; 1595                              | 22  |
| 3156; 3157; 1595                              | 22  |
| 3156; 3157; 1595                              | 22  |
| 3157; 1595; 3156                              | 22  |
| 3157; 1595; 3156                              | 22  |
| 3157; 1595; 3156                              | 22  |
| 3157; 1595; 3156                              | 22  |
| 3157; 1595; 3156                              | 22  |
| 3157; 1595; 3156                              | 22  |
| 3157; 1595; 3156                              | 22  |
| 3157; 1595; 3156                              | 22  |
| 3157; 1595; 3156                              | 22  |
| 3157; 1595; 3156                              | 22  |
| 3157; 1595; 3156                              | 22  |
| 3157; 1595; 3156                              | 22  |
| 3157; 1595; 3156                              | 22  |
| 3157; 1595; 3156                              | 22  |
| 3157; 1595; 3156                              | 22  |
| 3157; 1595; 3156                              | 22  |
| 3157; 1595; 3156                              | 22  |
| 51434; 8881; 996                              | 22  |
| 3930; 1595                                    | 6   |

|                                                                             |           |
|-----------------------------------------------------------------------------|-----------|
| 10768; 4144                                                                 | 6         |
| 9688; 79902; 23279; 53371; 8086                                             | 81        |
| 9688; 79902; 23279; 53371; 8086                                             | 82        |
| 51434; 8881; 996                                                            | 23        |
| 55183; 4292; 4683; 50813; 7398; 57599; 83990; 2873; 55215; 7874             | 320       |
| 51434; 8881; 996                                                            | 24        |
| 8881; 701; 51434; 996; 4085; 1019                                           | 124       |
| 4141; 10768; 4144                                                           | 25        |
| 3157; 3156                                                                  | 7         |
| 4683; 1653                                                                  | 7         |
| <b>10075; 1981; 4683; 8295; 1019</b>                                        | <b>87</b> |
| 1314; 79902; 53371; 535; 9276; 9688; 23279; 84340                           | 223       |
| 1786; 10592; 6596; 1019; 7298                                               | 89        |
| 3156; 1595; 3157                                                            | 26        |
| 577; 94005; 50813; 2873; 9276; 4141; 8473; 1981; 23358; 23198; 10651; 9688; | 2008      |
| 51434; 8881; 996                                                            | 27        |
| 79902; 1314; 53371; 9276; 9688; 23279                                       | 136       |
| 1786; 2618; 7298                                                            | 28        |
| 51434; 8881; 996                                                            | 28        |
| 1314; 53371; 9276; 9688; 79902; 23279                                       | 136       |
| 57448; 7337; 8881; 51434; 10075; 996                                        | 137       |
| 9688; 79902; 23279; 53371                                                   | 60        |
| 2146; 57634; 51434; 996; 4683; 8881; 1019                                   | 189       |
| 9688; 79902; 53371; 23279; 10015; 8086                                      | 143       |
| 10768; 4144                                                                 | 9         |
| 3156; 1595; 3157                                                            | 31        |
| 9688; 79902; 53371; 10015; 23279; 11168; 8086                               | 197       |
| 51434; 996; 8881; 1019; 23244                                               | 103       |
| 3156; 3157                                                                  | 10        |
| 9688; 79902; 53371; 10015; 8086; 23279; 11168; 84168                        | 253       |
| 79902; 53371; 9688; 23279; 8086                                             | 107       |
| 1503; 1841; 7298                                                            | 34        |
| 5289; 57521; 3156; 5571                                                     | 68        |
| 5519; 4085; 79902; 9735; 5289; 701; 11113; 3796; 9183; 23279; 5747          | 435       |
| 5876; 5519; 4292; 5571; 7874; 4683; 83990; 55215; 4848; 57521               | 374       |
| 57521; 3156; 5571                                                           | 36        |
| 3156; 3157                                                                  | 12        |
| 4144; 4141                                                                  | 12        |
| 57505; 4141; 80222                                                          | 38        |
| 3930; 1595                                                                  | 13        |
| 3930; 1595                                                                  | 13        |
| 3930; 1595                                                                  | 13        |
| 7298; 1503                                                                  | 13        |
| 7298; 1503                                                                  | 13        |

|                                                                             |      |
|-----------------------------------------------------------------------------|------|
| 7298; 2618                                                                  | 13   |
| 8295; 8881; 701; 51434; 996; 4085; 1019                                     | 219  |
| 1981; 57521; 5571                                                           | 41   |
| 7398; 55215; 57599                                                          | 41   |
| 10040; 10768; 27131; 10075; 1981; 9765; 50807; 5747; 84168; 10211; 10015    | 457  |
| 10869; 23198; 8295; 23358; 5719; 57599; 7874                                | 220  |
| 79902; 53371; 9688; 23279; 8086                                             | 120  |
| 10112; 23244                                                                | 14   |
| 55215; 4292                                                                 | 14   |
| 1981; 57521; 5519; 5571                                                     | 78   |
| 876; 79902; 57599; 8086; 55577; 94005; 50813; 2873; 9276; 8473; 23358; 2319 | 1383 |
| 79902; 53371; 23279; 8086; 1981; 9688                                       | 171  |
| 57505; 4141; 80222                                                          | 42   |

| effective_size |
|----------------|
| 339            |
| 563            |
| 480            |
| 186            |
| 129            |
| 140            |
| 113            |
| 141            |
| 12             |
| 41             |
| 32             |
| 51             |
| 35             |
| 78             |
| 36             |
| 21             |
| 21             |
| 109            |
| 249            |
| 82             |
| 26             |
| 96             |
| 96             |
| 28             |
| 29             |
| 103            |
| 30             |
| 30             |
| 30             |
| 31             |
| 31             |
| 32             |
| 143            |
| 33             |
| 33             |
| 34             |
| 34             |
| 34             |
| 57             |
| 413            |
| 116            |
| 36             |

37  
37  
37  
123  
93  
40  
41  
41  
41  
344  
42  
69  
70  
44  
2  
46  
46  
25  
25  
582  
584  
78  
27  
51  
52  
52  
29  
53  
54  
620  
31  
31  
31  
300  
89  
90  
14  
15  
63  
99  
66  
68  
186  
70

42

73

43

43

20

20

20

20

20

20

20

20

20

20

20

154

76

47

22

22

22

22

22

22

22

22

22

22

22

22

22

22

22

22

22

22

22

22

22

22

22

22

22

6

|      |
|------|
| 6    |
| 81   |
| 82   |
| 23   |
| 317  |
| 24   |
| 124  |
| 25   |
| 7    |
| 7    |
| 87   |
| 222  |
| 89   |
| 26   |
| 1999 |
| 27   |
| 135  |
| 28   |
| 28   |
| 136  |
| 137  |
| 60   |
| 188  |
| 141  |
| 9    |
| 31   |
| 195  |
| 103  |
| 10   |
| 251  |
| 106  |
| 34   |
| 68   |
| 430  |
| 371  |
| 36   |
| 12   |
| 12   |
| 38   |
| 13   |
| 13   |
| 13   |
| 13   |
| 13   |



|      |
|------|
| 13   |
| 219  |
| 40   |
| 40   |
| 455  |
| 220  |
| 120  |
| 14   |
| 14   |
| 78   |
| 1378 |
| 171  |
| 42   |
